# Supplementary material
Source: PubMed Central journal article supplement (PMC4801273)
Supplement: pnas.1518570113.sapp.pdf [file pnas.1518570113.sapp.pdf]

## Supporting Information

### 7-deazaguanine derivatives in DNA: a complex modification system encoded on a widespread genomic island

Jennifer J. Thiaville, Stefanie M. Kellner, Yifeng Yuan, Geoffrey Hutinet, Patrick C. Thiaville, Watthanachai Jumpathong, Susovan Mohapatra, Celine Brochier-Armanet, Andrey V. Letarov, Roman Hillebrand, Chanchal K. Malik, Carmelo Rizzo, Peter C. Dedon, and Valérie de Crécy-Lagard

## SI Material and Methods

### Bioinformatics Analyses

Analysis of the gene clusters was performed using tools on the public SEED server (<http://pubseed.theseed.org/SubsysEditor.cgi>) (1, 2) and, unless otherwise stated, we restricted our analyses to genomes only present in the public SEED database. Genes physically clustered with the *tgtA5* gene were analyzed in all organisms containing a *tgtA5* gene using the the SEED subsystem coloring tool or the Seedviewer Compare regions tool. Presence of each *dpd* gene in the clusters was identified using the Seedviewer Compare regions tool, “Edit Empty Cells” tool on the SEED spreadsheet page, or “Find this gene in organism” on the SEEDviewer page for a gene of interest. The tools employ similarity based searches (BLAST or tBLASTn) to identify the closest matches to the gene/protein of interest. Once an open reading frame was identified, we assessed physical clustering with *tgtA5* and analyzed domain architecture using the Conserved Domain Database (CDD) (<http://www.ncbi.nlm.nih.gov/Structure/cdd/wrpsb.cgi>) (9). Genes annotated as *dpd* genes were required to meet two criteria, in addition to sequence similarity: 1) they must be encoded in the neighborhood of a *tgtA5* gene; 2) the encoded protein must have similar predicted domains (See Fig. S5 for domains present in *S. Montevideo* Dpd proteins).

Taxonomic distribution of *tgtA5* was also visualized using the Interactive Tree of Life (iTOL, [itol.embl.de](http://itol.embl.de)) (3). All information for NCBI TaxIDs and presence or absence of genes was exported from the SEED subsystem “dpd cluster”. A text file containing the NCBI TaxIDs of representative organisms was uploaded into iTOL and the tree was generated using the “Generate Tree” tool. The tree was added to the project on the user’s account. Datasets for each gene containing the TaxID and 1 for presence or 0 for absence of the *tgtA5* were uploaded to the project, binary was selected for “Data Type”, and the tree containing the data for presence or absence of the *tgtA5* was generated.

For other sequence analyses, the BLAST tools (4) and resources at NCBI (<http://www.ncbi.nlm.nih.gov/>) were routinely used. Sequence alignments were built using MUSCLE (5) and Multialin (6), and sequence logos were built from the alignments using WebLogo (7). Protein domain analysis was performed using the Pfam database tools (<http://pfam.xfam.org/>) (8), the Conserved Domain Database (CDD) (<http://www.ncbi.nlm.nih.gov/Structure/cdd/wrpsb.cgi>) (9), HHpred (<http://toolkit.tuebingen.mpg.de/hhpred>) (10), and Phyre2 (<http://www.sbg.bio.ic.ac.uk/phyre2/>) (11). For detailed domain analysis of *S. Montevideo* sequences presented in Fig. S5 and Table S2, protein sequences for DpdA to DpdK were acquired from the SEED database and used as queries against the Pfam database through HHpred (10) with the default parameters selected. The top ranking hits, with a probability over 70%, were used for identification and are reported in Table S2. For regions of a protein with either no hits or low probability scores, the sequence of that region was resubmitted as a separate query.

The sequence alignment of select aTGT, bTGT, and TgtA5 proteins presented in Figure 2B was performed using MUSCLE (5). The protein sequences were retrieved from the SEED database using the following accession numbers: *S. Montevideo*, fig|745015.3.peg.1828; *Ferrimonas balearica*, fig|550540.3.peg.3256; *Sphingopyxis alaskensis*, fig|317655.17.peg.2735; *Comamonas testosteroni*, fig|1009852.3.peg.2809; *Kineococcus radiotolerans*, fig|266940.5.peg.4549; *E. coli*, fig|340185.4.peg.3772; *Zymomonas mobilis*, fig|264203.3.peg.859; *Shigella flexneri*, fig|766155.3.peg.537; *Bacillus subtilis*, fig|1148.72.peg.5059; *Aquifex aeolicus*, fig|224324.1.peg.910; *Pyrococcus horikoshii*, fig|70601.1.peg.1088; *Methanococcus aeolicus*, fig|419665.8.peg.915; *Thermoplasma volcanium*, fig|273116.1.peg.1497; *Picrophilus torridus*, fig|263820.1.peg.454; *Ferroplasma acidarmanus*, fig|97393.1.peg.1817.

### Phylogenetic analysis of TgtA5/DpdA and DpdB

A survey of the 30578 proteomes deduced from complete and ongoing genome projects available at the NCBI allowed retrieval of 284 DpdA homologues. The corresponding protein sequences were aligned with MAFFT version 7 (option -L-INS-i) (12). The resulting alignments were trimmed with BMGE (BLOSUM30 option) (13). Maximum Likelihood (ML) trees were inferred with PhyML version 3.1 (14), with the Le and Gascuel model (LG) (15) and a gamma distribution to take into account evolutionary rate among site heterogeneity. A NNI + SPR strategy was used for topology search. The robustness of the ML tree was evaluated by the non-parametric bootstrap strategy implemented in PhyML (100 replicates of the original alignment). Bayesian trees were inferred with MrBayes v3.2.2 (16). MrBayes was run with four chains for 1 million generations and trees were sampled every 100 generations. To construct the consensus tree, the first 2000 trees were discarded as “burn-in”.

For analysis of the DndB-like family of proteins, sequences of the DndB-like Dpd proteins clustering with DpdA were acquired from the SEED database through the “dpd cluster” subsystem and DndB proteins clustering with DndC and other phosphorothioate proteins were acquired from the SEED database through the “DNA phosphorothioation” subsystem. Sequences were submitted to phylogeny.fr (<http://www.phylogeny.fr/advanced.cgi>) (17) using default parameters in “Advanced” mode.

### Bioinformatic identification of phage Tgt-like proteins

Bacteriophage Tgt-like proteins were identified by 3 iterations of psiBLAST, with standard parameters, using the phage 9g Tgt-like protein (18) sequence as query against the Virus database of NCBI. Each of the protein hits was verified by HHpred (10) using default parameters on the Bioinformatic toolkit website from the Max-Planck institute (<http://toolkit.tuebingen.mpg.de/hhpred>). The pdb70 HMM database was searched, and the multiple alignment methods were performed with HHblitz with three iterations. The sequences returned either the archaeal Tgt or the bacterial Tgt as predicted homologs. For each phage genome containing a *tgt*-like gene, the presence of Q biosynthesis pathway genes (*folE*, *queD*, *queE*, *queC*, *queF*, *queA*, and *queG*) was investigated by BLASTp and then confirmed by HHpred. All protein sequences verified by HHpred returned their respective predicted homolog with a probability of 100 %.

### Strains, media, and growth conditions

All strains used in this study are listed in Table S3. *S. Montevideo* strains and *E. coli* C600 were grown in LB (Tryptone 10 g/L, yeast extract 5 g/L, NaCl 5 g/L) at 37 °C. *Kineococcus radiotolerans* was grown in TYG (Tryptone 5.0 g/L, yeast extract 5.0 g/L, Glucose 5.0 g/L) at 30 °C. Strains obtained from DSMZ were grown in conditions recommended by the company. *Comamonas testosteroni* DSM 50244 was grown in Nutrient Broth (Peptone 5.0 g/L, Beef extract 3.0 g/L) at 30 °C. *Ferrimonas balearica* DSM 9799 was grown in Difco Marine Broth 2216 (BD, Franklin Lakes, New Jersey) at 28 °C. *Meiothermus chliarophilus* DSM 9957 was grown in Castenholz medium (DSMZ Medium 86) at 50 °C. *Sphingopyxis alaskensis* DSM 13593 was grown in Tryptone Soya Broth (TSB, Oxoid) at 28 °C. For all solid media, 15 g/L agar was added.

### **Construction of mutations in *Salmonella* Montevideo genes**

All deletion constructs were made using the linear recombination method described by Datsenko and Wanner (19). Deletion primers (Table S4) were designed with 50 bp of homology to the gene to be deleted. The P1 or P2 sites were added to the 3' end of each primer to amplify the chloramphenicol or kanamycin resistance cassettes from pKD3 and pKD4, respectively (19). For the 21-kb deletion of nearly the entire *dpd* cluster, the primers matched the 5' end of the *dpdC* gene and the 3' portion of the *dpdD* gene. PCR products were cleaned using the Zymo Clean and Concentrator-5 kit (Zymo Research), and 200 ng of PCR product was transformed via electroporation into freshly prepared electrocompetent *S. Montevideo* carrying the temperature-sensitive pKD46. Chloramphenicol or kanamycin resistant isolates were selected on LB-agar plates with 15 µg/mL of chloramphenicol or 40 µg/mL of kanamycin, respectively. All mutations were verified by PCR for loss of the target gene(s) and presence of the antibiotic resistance marker in the correct locations.

### **Plasmid Restriction Test**

Restriction of the plasmid pUC19 was tested using a modified transformation efficiency method (20, 21). The pUC19 plasmid was propagated through *S. Montevideo* WT or YYF3022 ( $\Delta dpdB-dpdC::kan$ ) and isolated from each strain using QIAprep Spin Miniprep Kit (Qiagen). The presence or absence of the modification on pUC19 was confirmed as described in DNA analysis. 10 ng of each plasmid (modified or unmodified) was transformed by electroporation into freshly prepared electrocompetent *S. Montevideo* WT and YYF3022. Transformants were recovered in 1 mL LB for 1 hour at room temperature and dilutions were plated onto LB agar plates with or without ampicillin (100 µg/mL). Transformation efficiency was determined by calculating the number of Amp<sup>R</sup> transformants per 10<sup>6</sup> viable CFU and dividing by the ng of DNA transformed.

### **Bacterial DNA isolation**

A 500 mL culture of each strain was grown in the proper conditions described above. Cells were harvested by centrifugation at 10,000 x g for 20 min. Pellets were washed once in 40 mL TEN buffer (100 mM Tris, pH 8.0; 100 mM NaCl; 10mM EDTA, pH 8.0) and centrifuged again. Pellets were suspended in 20 mL TEN buffer with 600 µg/ml lysozyme, 1 % SDS, 6 mAU/ml Proteinase K (Qiagen), and incubated at 56 °C for 1 h. Following incubation, an equal volume of Tris-buffered phenol, pH 7 was added to each sample and incubated with shaking at room temperature overnight. The samples were centrifuged at 4,000 x g at room temperature for 10 min and the aqueous phase was transferred to the new tubes. The extractions were repeated with

the mixture of 25:24:1 phenol:chloroform:isoamyl alcohol followed by a chloroform extraction. After the final extraction, the aqueous phase was treated with 200 µg/mL RNase A (Qiagen) for 30 min at 37 °C. The RNase was removed by another round of phenol:chloroform extraction. The DNA was precipitated with 0.1 volume sodium acetate and 1 volume isopropanol and spooled with a glass rod. After washing briefly in 70% ethanol, the DNA was suspended in sterile deionized water.

### Phage 9g DNA isolation

50 mL of LB medium was inoculated with 1 mL of an overnight culture of *E. coli* C600 and incubated at 37 °C with shaking at 250 rpm until an OD<sub>600</sub> 0.6 was reached. The culture was inoculated with 10<sup>9</sup> PFU of bacteriophage 9g and incubated in the same conditions for an additional 5 h. The lysate was cleared by centrifugation at 10,000 x g for 10 min and the phage titer was determined (expected yield, approximately 10<sup>11</sup> PFU/mL). The lysate was treated with DNase (0.01 mg/mL) and RNase (0.05 mg/mL) for 1 h at 37 °C. The phage was pelleted by ultracentrifugation in JS-28.35 rotor (Beckmann-Coulter, USA) at 70,000 x g for 1 h through 1 cm of a 20% glycerol pad prepared on SM buffer without gelatin (100 mM NaCl, 1 mM of MgCl<sub>2</sub>, 50 mM of TrisHCl, pH 7.5). The supernatant was discarded and the phage was resuspended in 1 mL of SM buffer. Phage DNA was extracted with an equal volume Tris-HCl-saturated phenol, pH 8 in 1.5 ml Eppendorf tubes with gentle rotation for 1-2 min. The tubes were centrifuged for 3 min at 10,000 x g, the aqueous phase was transferred to the new tubes containing tips with cut ends, and extracted with 0.4 volumes of TE-saturated chloroform according to the same procedure. The DNA was precipitated by addition of 2.5 vol of 96% ethanol, pelleted at 13,000 x g at 4 °C at 20 min, washed with 70% ethanol and dried in a Vacuum Concentrator System (Labconco) at 40 °C for 30 min. The DNA pellet was suspended in 100 µl of sterile deionized water.

### Synthesis of 7-deaza-2'-deoxyguanosine standards

**Mass spectrometric analysis of standards.** High resolution mass spectrometric (HRMS) measurements were performed on a Waters Synapt HDMS QTOF mass spectrometer with the following parameters: Capillary voltage 2.5 kV, sampling cone 20 V, extraction cone 3 V, source temperature 80 °C, desolvation temperature 40 °C, trap collision energy 4.0 eV, and transfer collision energy 8.0 eV.

**2-Amino-7-(2-deoxy-β-D-erythro-pentofuranosyl)-4,7-dihydro-4-oxo-3H-pyrrolo[2,3-d]pyrimidine-5-carbonitrile (dPreQ<sub>0</sub>):** dPreQ<sub>0</sub> was prepared from 7-iodo-7-deaza-2'-deoxyguanosine (MyChem LLC, San Diego, CA) as previously described by Ramzaeva, *et al.* (22) and purified by HPLC using a Phenomenex Luna- 5µ C18(2) 100 Å column (250 mm × 4.6 mm, 5 µM particle size) equilibrated with 99% solvent A (0.1 M ammonium formate) and 1% solvent B (acetonitrile) and eluted with the following solvent gradient: 0 to 15 min, linear gradient from 99% to 90% A; 90% A for 5 min; 20 to 25 min, linear gradient to 80% A; 25 to 28 min, linear gradient to 20% A; 20% A for 2 min; 30 to 33 min, linear gradient to 99%. Under these conditions, dPreQ<sub>0</sub> eluted at *t<sub>r</sub>* 19 min. HRMS: *m/z* calculated for C<sub>12</sub>H<sub>14</sub>N<sub>5</sub>O<sub>4</sub> [M + H]<sup>+</sup>, 292.1046; observed, 292.1038.

**2-Amino-7-(2-deoxy-β-D-erythro-pentofuranosyl)-4,7-dihydro-4-oxo-1H-pyrrolo[2,3-d]pyrimidine-5-carboxylic acid (dCDG):** dCDG was prepared from dPreQ<sub>0</sub> as previously described by Ramzaeva *et al.* (22) and purified by HPLC using a Phenomenex Luna- 5µ C18(2) 100 Å column (250 mm × 4.6 mm, 5 µM particle size) equilibrated with 99% solvent A (0.1 M

ammonium formate) and 1% solvent B (acetonitrile) and eluted with the following solvent gradient: 17 to 19 min linear gradient from 99% to 80% A; 80% A for 1 min; 20 to 22 min, linear gradient to 99% A. Under these conditions, dCDG eluted at 10 min. HRMS:  $m/z$  calculated for  $C_{12}H_{15}N_4O_6 [M + H]^+$ , 311.0992; observed, 311.1005.

**2-Amino-7-(2-deoxy- $\beta$ -D-erythro-pentofuranosyl)-4,7-dihydro-4-oxo-1H-pyrrolo[2,3-d]pyrimidine-5-carboxamide (dADG):** dADG was prepared from dPreQ<sub>0</sub> as previously described by Ramzaeva *et al.* (22) and purified by HPLC using a Phenomenex Luna- 5 $\mu$  C18(2) 100 Å column (250 mm  $\times$  4.6 mm, 5  $\mu$ M particle size) equilibrated with 99% solvent A (0.1 M ammonium formate) and 1% solvent B (acetonitrile) and eluted with the following solvent gradient: 0 to 15 min, linear gradient from 99% to 90% A; 90% A for 5 min; 20 to 25 min, linear gradient to 80% A; 25 to 28 min, linear gradient to 20% A; 20% A for 2 min; 30 to 33 min, linear gradient to 99% A. Under these conditions, dADG eluted at 15 min. HRMS:  $m/z$  calculated for  $C_{12}H_{16}N_5O_5 [M + H]^+$ , 310.1151; observed, 310.1265.

**2-Amino-7-(2-deoxy- $\beta$ -D-erythro-pentofuranosyl)-4,7-dihydro-4-oxo-3H-pyrrolo[2,3-d]pyrimidine-5-carboximidamide (dG<sup>+</sup>):** dG<sup>+</sup> was prepared from dPreQ<sub>0</sub> as previously described by Brückl *et al.* (23). As noted by these authors, dG<sup>+</sup> reverts to dPreQ<sub>0</sub> upon purification, so dG<sup>+</sup> was therefore not isolated. HRMS:  $m/z$  calculated for  $C_{12}H_{17}N_6O_4 [M + H]^+$ , 309.1311; observed, 309.1251.

**2-Amino-5-(aminomethyl)-7-(2-deoxy- $\beta$ -D-erythro-pentofuranosyl)-3,7-dihydro-4H-Pyrrolo[2,3-d]pyrimidin-4-one (dPreQ<sub>1</sub>):** dPreQ<sub>1</sub> was prepared as previously described by Wang and Gold (24) and purified by HPLC using a Phenomenex Luna-5 $\mu$  C18(2) 100 Å column (250 mm  $\times$  4.6 mm, 5  $\mu$ M particle size) equilibrated with 99% solvent A (0.1 M ammonium formate) and 1% solvent B (acetonitrile) and eluted with the following solvent gradient: 0 to 15 min, linear gradient from 99% to 90% A; 90% A for 5 min; 20 to 25 min, linear gradient to 80% A; 25 to 28 min, linear gradient to 20% A; 20% A for 2 min; 30 to 33 min, linear gradient to 99% A. Under these conditions, dPreQ<sub>1</sub> eluted at 10.8 min. LC-MS/MS:  $m/z$  calculated for  $C_{12}H_{18}N_5O_4 [M + H]^+$ , 296.1359; observed, 296.1.

#### DNA analysis

DNA (100  $\mu$ g) was hydrolyzed in 10 mM Tris-HCl (pH 7.9) with 1 mM MgCl<sub>2</sub> with Benzonase (20U), DNase I (4U), calf intestine phosphatase (17U) and phosphodiesterase (0.2U) for 16 h at ambient temperature. Following passage through a 10 kDa filter to remove proteins, the filtrate was lyophilized and resuspended to a final concentration of 2  $\mu$ g/ $\mu$ L (based on initial DNA quantity); a final concentration of 0.2  $\mu$ g/ $\mu$ L was used for dADG quantification. Standards for dADG, dCDG, dG<sup>+</sup>, dPreQ<sub>0</sub>, and dPreQ<sub>1</sub> were synthesized as described above.

Modified 2'-deoxynucleosides were initially detected by liquid chromatography-coupled triple quadrupole mass spectrometry (LC-MS/MS). Aliquots of hydrolyzed DNA (20  $\mu$ g) were injected onto a Dionex Acclaimed Polar Advantage II C18 column (2.1  $\times$  250 mm, 3  $\mu$ m particle size) equilibrated with 95.5% solvent A (0.1% v/v formic acid in water) and 0.5% solvent B (acetonitrile) at a flow rate of 0.25 mL/min and eluted with the following solvent gradient: 22% B for 15 min, 0.1 min ramp to 100% B for 10 min, 1 min ramp to 0.5% B for 10 min. The HPLC column was coupled to an Agilent 6430 triple quadrupole mass spectrometer (Agilent, Santa Clara, CA) with electrospray ionization in positive ion mode and the following parameters: spray voltage 3.8 kV, capillary temperature 325 °C, nebulizer gas 30 psi, fragmentor voltage 76 V, and collision energy 4 V. 2'-Deoxynucleosides were detected using selected reaction monitoring (SRM) for the following transitions involving loss of 2-deoxyribose:  $m/z$  326 $\rightarrow$ 210 for dCPH<sub>4</sub>,

311→195 for dCDG, 292→176 for dPreQ<sub>0</sub>, 296→180 for dPreQ<sub>1</sub>, 394→278 for dQ and 309→193 for dG<sup>+</sup>.

Subsequent structural corroboration of dPreQ<sub>0</sub> and dADG was achieved by liquid chromatography-coupled quadrupole time-of-flight mass spectrometry (LC-QTOF). Using HPLC conditions and retention times defined earlier, hydrolyzed bacterial DNA was resolved by HPLC and fractions containing dPreQ<sub>0</sub> and dADG were collected, pooled (3-4 HPLC runs), dried, and redissolved in water. These samples were analyzed by LC-QTOF using the HPLC system noted earlier coupled to an Agilent 6510 QTOF mass spectrometer with an electrospray ionization source operated in positive ion mode with the following parameters: drying gas temperature, 325 °C; drying gas flow, 8 L/min; nebulizer, 25 psi; capillary voltage, 3500 V; fragmentor voltage of 90-140 V or 90 V; collision energy 5-15 V.

Quantification of dPreQ<sub>1</sub>, dPreQ<sub>0</sub>, dADG, dCDG, and dG<sup>+</sup> was achieved by LC-MS/MS using external calibration curves. A stock solution of standards was prepared with the following concentrations: 1 mM dC, dG, dT and dA; 10 nM each dPreQ<sub>1</sub>, dPreQ<sub>0</sub> and dCDG; and 100 nM dADG; the concentration of dPreQ<sub>1</sub>, dPreQ<sub>0</sub>, dCDG, and dADG were quantified on the basis of the PreQ<sub>0</sub> extinction coefficient  $\epsilon_{264} = 10,090 \text{ M}^{-1}\text{cm}^{-1}$  (25). Nine calibration solutions were then prepared with the lowest concentrations of 2  $\mu\text{M}$  each dC, dG, dT and dA; 20 pM each dPreQ<sub>1</sub>, dPreQ<sub>0</sub> and dCDG; and 200 pM dADG. Calibration samples (10  $\mu\text{L}$ ) were interspersed with DNA hydrolysate samples and injected on an Agilent 1290 series HPLC equipped with a Kinetex EVO C18 column (150 mm x 2.1 mm, 2.6 $\mu\text{m}$  particle size, 100 Å pore size; Phenomenex) and a diode array detector (DAD). The column was heated to 40 °C and eluted at 0.5 mL/min with 100% solvent A (5 mM ammonium acetate, pH 5.3) for 2 min followed by a linear gradient to 10% solvent B (acetonitrile) over 8 min, 60% solvent B at 9 min and held for 1 min. The column eluent was monitored by UV absorbance at 260 nm to determine the retention times of canonical 2'-deoxynucleosides (dC, 1.2 min; dG, 3.8 min; dT, 4.2 min; and dA, 5.5 min). The HPLC column was coupled to an Agilent 6430 triple quadrupole mass spectrometer with an electrospray ion source in positive ion mode and parameters as follows: gas temperature 300 °C, gas flow 12 L/min, nebulizer pressure 40 psi, and capillary voltage 3800 V. 2'-Deoxynucleosides were identified and quantified in multiple reaction monitoring mode (MRM) using previously optimized conditions. Using the transitions noted earlier, the modified 2'-deoxy-7-deazaguanosines were detected at the following retention times: dPreQ<sub>1</sub>, 3.2 min; dG<sup>+</sup>, 6.0 min; dADG, 6.4 min; dPreQ<sub>0</sub>, 6.7 min; and dCDG, 7.1 min. The limit of detection was determined to 1-2 fmol for the five modified 2'-deoxynucleosides, which corresponds to ~10 modifications per 10<sup>6</sup> nucleotides in 2  $\mu\text{g}$  of injected DNA digest.

### tRNA Extraction

For bulk tRNA extractions, *S. Montevideo* cultures were grown in 200 mL LB at 37 °C, with shaking at 250 rpm overnight and *K. radiotolerans* cultures were grown in 1 L TYG at 30 °C, with shaking at 250 rpm overnight. Cells were harvested by centrifugation at 8,000 x g for 20 min at 4 °C. Pellets washed once in 0.1 volume of 95% ethanol. Pellets were centrifuged again and suspended in 50 mM sodium acetate, pH 5.5 at 3 mL/g of cell weight. One volume of acidic-buffered phenol (pH 5.5) was added and incubated at 70 °C for 30 min. The samples were centrifuged at 4,000 x g at room temperature for 10 min. A mixture of 25:24:1 phenol:chloroform:isoamyl alcohol was added to the aqueous phase, and the samples were centrifuged again. After a second chloroform extraction, sodium chloride was added to a final concentration of 1 M and 0.2 volume of isopropanol was added to the aqueous phase. The

samples were centrifuged again, and 0.6 volume of isopropanol was added to the supernatant and incubated overnight at -20 °C. The samples were centrifuged again, and the pellets were washed with 80% ethanol and dried in the Vacuum Concentrator Systems (Labconco) at 40 °C for 30 min. The pellets were suspended in 100 µL TE buffer (100 mM Tris, pH 8.0; 10mM EDTA, pH 8.0).

### **Detection of queuosine in bulk tRNAs**

Detection of the presence of Q in tRNA of *S. Montevideo* was adapted from a protocol developed by Igloi and Kossel (26) and recently used by Zaborske *et al.* (27). For each sample, 10 µg of total tRNA was deacylated by incubation in 100 mM Tris-HCl (pH 9) for 30 min at 37 °C. Deacylated tRNAs were precipitated using ammonium acetate, isopropanol, and linear polyacrylamide as a carrier. The pellet obtained was washed with 70% ethanol and dried in a Vacuum Concentrator System (Labconco) at 40 °C for 10 min. For each lane, 1 µg of deacylated tRNAs were resuspended in RNA Loading Dye (NEB) and loaded onto a denaturing 8M urea, 8% polyacrylamide gel containing 0.5% 3-(Acrylamido)phenylboronic acid (Sigma-Aldrich). The migration was performed at 4 °C in 1X TAE. Migrated tRNAs were transferred onto a Biorad B pre-cut Nylon membrane (Thermo Scientific) using a wet transfer apparatus in 1X TAE at 150 mA 4 °C for 90 min. After the transfer, the membrane was baked in an oven for 30 min at 80 °C and then UV irradiated in a UV Crosslinker (Fisher FB-UVXL-1000) at a preset UV energy dosage of 120 mJ/cm<sup>2</sup>. tRNA<sup>ASP</sup> was detected with the North2South Chemiluminescent Hybridization and Detection Kit (Thermo) using the specific biotinylated primer (5' biotin-CCCTCGGTGACAGGCAGG 3'). The blot was exposed to X-Ray film (Thermo Scientific, CL-X Posure Film) for 5 seconds. The film was developed using a Film Processor (Konica QX-60A).

Detection of Q and PreQ<sub>0</sub> on the tRNA of *K. radiotolerans* was performed as described previously (28). Briefly, samples of each purified bulk tRNA preparation were enzymatically hydrolyzed as described by P. Crain (29) and liquid chromatography-coupled tandem mass spectrometry (LC-MS/MS) as described by Pomerantz and McCloskey (30).

**Table S1.** *tgtA5/dpdA* containing organisms

| Organism                                    | TaxID   | UniProt Entry of DpdA <sup>a</sup> | Genes in <i>dpd</i> cluster |             |             |             |             |             |             |             |             |             |             |             |             |             | Queosine genes not in cluster |                        |              |              |             |             |             |            |             |             |
|---------------------------------------------|---------|------------------------------------|-----------------------------|-------------|-------------|-------------|-------------|-------------|-------------|-------------|-------------|-------------|-------------|-------------|-------------|-------------|-------------------------------|------------------------|--------------|--------------|-------------|-------------|-------------|------------|-------------|-------------|
|                                             |         |                                    | <i>dpdA</i>                 | <i>dpdB</i> | <i>dpdC</i> | <i>dpdD</i> | <i>dpdE</i> | <i>dpdF</i> | <i>dpdH</i> | <i>dpdJ</i> | <i>dpdK</i> | <i>folE</i> | <i>queD</i> | <i>queE</i> | <i>queC</i> | <i>yhhQ</i> | <i>tgt-ike</i>                | Other DBP <sup>b</sup> | <i>folE1</i> | <i>folE2</i> | <i>queD</i> | <i>queE</i> | <i>queC</i> | <i>tgt</i> | <i>yhhQ</i> | <i>queF</i> |
| <i>Kineococcus radiotolerans</i> SRS30216   | 266940  | A6WGA1                             | 1                           | 2           | 1           | 1           | 1           | 1           | 1           | 1           | 1           | 1           | 1           | 1           | 1           | 1           |                               | 1                      |              |              |             |             |             |            |             |             |
| <i>Kribbella flavida</i> DSM 17836          | 479435  | D2PYU7                             | 1                           | 2           | 1           | 1           | 1           | 1           | 1           | 1           | 1           | 1           | 1           | 1           | 1           |             |                               |                        |              |              |             |             |             |            |             |             |
| <i>Nocardioideaceae</i> bacterium Broad-1   | 408672  | E9US40                             | 1                           | 2           | 1           | 1           | 1           | 1           | 1           | 1           | 1           | 1           | 1           | 1           | 1           |             |                               |                        |              |              |             |             |             |            |             |             |
| <i>Streptomyces griseoflavus</i> Tu4000     | 467200  | UPI0001B50039                      | 1                           | 2           | 1           | 1           | 1           | 1           | 1           | 1           | 1           | 1           | 1           | 1           | 1           | 1           | 1                             |                        |              |              |             |             |             |            |             |             |
| <i>Gordonia paraffinivorans</i> NBRC 108238 | 1223543 | M3V7F5                             | 1                           | 2           | 1           | 1           | 1           | 2           | 1           | 1           | 1           | 1           | 1           | 1           | 1           |             | 1                             |                        |              |              |             |             |             | 1          | 1           |             |
| <i>Nocardia</i> sp. 348MFTsu5.1             | 1172185 | UPI000370E8C7                      | 1                           | 2           | 1           | 1           | 1           | 1           | 1           | 1           | 1           | 1           | 1           | 1           | 1           |             | 1                             |                        |              |              |             |             |             | 1          | 1           |             |
| <i>Salinispora arenicola</i> CNR107         | 1169167 | UPI0003821849                      | 1                           | 2           | 1           | 1           | 1           | 1           | 1           | 1           | 1           | 1           | 1           | 1           | 1           |             | 1                             |                        |              |              |             |             |             |            |             |             |
| <i>Salinispora arenicola</i> DSM 45545      | 999546  | UPI00036525C0                      | 1                           | 2           | 1           | 1           | 1           | 1           | 1           | 1           | 1           | 1           | 1           | 1           | 1           |             | 1                             |                        |              |              |             |             |             |            |             |             |
| <i>Kribbella catacumbae</i> DSM 19601       | 1122138 | n.d.                               | 1                           | 2           | 1           | 1           | 1           | 1           | 1           | 1           | 1           | 1           | 1           | 1           | 1           |             | 3                             |                        |              |              |             |             |             |            |             |             |
| <i>Amycolatopsis nigrescens</i> CSC17Ta-90  | 1068980 | n.d.                               | 1                           | 2           | 1           | 1           | 1           | 1           | 1           | 1           | 1           | 1           | 1           | 1           | 1           |             | 3                             |                        | 1            | 1            | 1           |             |             |            |             |             |
| <i>Streptomyces chartreusis</i> NRRL 12338  | 1079986 | n.d.                               | 1                           | 2           | 1           | 1           | 1           | 1           | 1           | 1           | 1           | 1           | 1           | 1           | 1           | 1           | 2                             |                        |              |              |             |             |             |            |             |             |
| <i>Streptomyces</i> sp. ATexAB-D23          | 1157635 | UPI0003813600                      | 1                           | 2           | 1           | 1           | 1           | 1           | 1           | 1           | 1           | 1           | 1           | 1           | 1           |             | 1                             |                        |              |              |             |             |             |            | 1           |             |
| <i>Streptomyces</i> sp. FXJ7.023            | 579932  | UPI00055C92B7                      | 1                           | 2           | 1           | 1           | 1           | 1           | 1           | 1           | 1           | 1           | 1           | 1           | 1           |             | 1                             |                        |              |              |             |             |             |            |             |             |
| <i>Meiothermus chliarophilus</i> DSM9957    | 926560  | UPI0004218CCF                      | 1*                          |             |             |             | 1           | 1           | 1           | 1           | 1           | 1           | 1           | 1           | 1           | 1           | 1                             |                        |              |              |             |             | 1           | 1          |             |             |



| Organism                                              | TaxID   | UniProt Entry of DpdA <sup>a</sup> | Genes in <i>dpd</i> cluster |             |             |             |             |             |             |             |             |             |             |             |             | Queosine genes not in cluster |                 |                        |              |              |             |             |             |            |             |
|-------------------------------------------------------|---------|------------------------------------|-----------------------------|-------------|-------------|-------------|-------------|-------------|-------------|-------------|-------------|-------------|-------------|-------------|-------------|-------------------------------|-----------------|------------------------|--------------|--------------|-------------|-------------|-------------|------------|-------------|
|                                                       |         |                                    | <i>dpdA</i>                 | <i>dpdB</i> | <i>dpdC</i> | <i>dpdD</i> | <i>dpdE</i> | <i>dpdF</i> | <i>dpdH</i> | <i>dpdJ</i> | <i>dpdK</i> | <i>folE</i> | <i>queD</i> | <i>queE</i> | <i>queC</i> | <i>yhhQ</i>                   | <i>tgt-like</i> | Other DBP <sup>b</sup> | <i>folE1</i> | <i>folE2</i> | <i>queD</i> | <i>queE</i> | <i>queC</i> | <i>tgt</i> | <i>yhhQ</i> |
| <i>Desulfurobacterium thermolithotrophum</i> DSM11699 | 868864  | F0S2D6                             | 1                           |             |             |             |             |             |             |             |             |             |             |             |             |                               | 2               | 1                      |              |              | 1           | 1           | 1           |            | 1           |
| <i>Spirosoma spitsbergense</i> DSM 19989              | 1123278 | UPI00037258A1                      | 1*                          |             |             |             |             |             |             |             | 1           | 1           | 1           | 1           |             | 1                             | 7               | 1                      | 1            |              | 1           |             | 1           | 1          |             |
| <i>Cyanothece</i> sp. CCY0110                         | 391612  | A3IZM8                             | 1*                          |             |             |             |             |             |             |             |             |             |             |             |             |                               |                 | 3                      |              | 1            | 1           | 1           | 1           |            | 1           |
| <i>Geitlerinema</i> sp. PCC 7407                      | 1173025 | K9SAS3                             | 1*                          |             | 1           |             | 1           | 1           | 1           | 1           |             | 1           | 1           | 1           |             |                               |                 | 1                      |              | 1            | 1           | 1           | 1           |            | 1           |
| <i>Microcoleus</i> sp. PCC 7113                       | 1173027 | K9WRC9                             | 1*                          | 1           |             |             |             |             | 1           | 1           |             | 1           |             |             |             | 1                             | 1               | 2                      |              |              | 1           | 1           | 1           |            | 1           |
| <i>Oscillatoria</i> sp. PCC 10802                     | 1173028 | UPI000345CE7C                      | 1                           |             |             |             |             |             | 1           |             |             |             |             |             |             | 1                             |                 | 1                      |              | 1            | 1           | 1           | 1           |            | 1           |
| <i>Paenibacillus polymyxa</i>                         | 1406    | G0VWT7                             | 1*                          |             |             |             |             |             |             |             |             | 1           | 1           | 1           | 1           | 1                             | 3               | 1                      | 1            | 1            | 1           | 1           | 1           | 1          | 1           |
| <i>Paenibacillus polymyxa</i> SC2                     | 886882  | E3EGG6                             | 1*                          |             |             |             |             |             |             |             |             | 1           | 1           | 1           | 1           | 1                             | 3               | 1                      | 1            | 1            | 1           | 1           | 1           | 1          | 1           |
| <i>Paenibacillus vortex</i> V453                      | 715225  | UPI0001F05DD6                      | 1*                          |             | 1           | 1           | 1           | 1           | 1           | 1           |             | 1           | 1           | 1           |             | 1                             | 1               | 1                      |              | 1            | 1           | 1           | 1           |            | 1           |
| <i>Blastopirellula marina</i> DSM 3645                | 314230  | A3ZSB0                             | 1                           | 2           | 1           | 1           | 2           | 1           | 1           | 1           | 1           |             | 1           | 1           |             |                               |                 |                        |              | 1            | 2           | 1           | 1           | 1          | 1           |
| <i>Bradyrhizobium</i> sp. S23321                      | 335659  | I0FZ26                             | 1                           | 2           | 1           |             |             | 1           | 1           | 1           |             |             |             |             |             |                               | 1               | 2                      |              | 1            | 1           | 1           | 1           |            |             |
| <i>Methylobacterium extorquens</i> AM1                | 272630  | C5B4Q4                             | 1                           |             |             |             |             |             |             |             |             |             |             |             |             |                               |                 |                        |              | 1            | 1           | 1           | 1           |            | 1           |
| <i>Sinorhizobium fredii</i> USDA 257                  | 1185652 | I3WZI7                             | 1                           | 2           | 1           | 1           | 1           | 1           | 1           | 1           | 1           |             | 1           | 1           | 1           |                               |                 |                        |              | 1            | 1           | 1           | 1           | 1          | 1           |
| <i>Sphingobium chlorophenicum</i> L-1                 | 690566  | F6EUE7                             | 1                           | 2           | 2           |             |             |             |             |             |             | 1           |             | 1           |             |                               |                 |                        |              | 1            | 1           | 1           | 1           | 2          | 1           |
| <i>Sphingopyxis alaskensis</i> RB2256                 | 317655  | Q1GPS0                             | 1                           | 2           | 1           | 1           | 1           | 1           | 1           | 1           | 1           |             | 1           | 1           | 1           |                               |                 |                        |              | 1            |             | 1           | 1           | 2          | 1           |
| <i>Burkholderia</i> sp. CCGE1003                      | 640512  | E1T3X2                             | 1                           | 2           | 1           |             |             |             |             |             |             | 1           |             | 1           |             |                               |                 |                        |              | 1            | 1           | 1           | 1           | 1          | 1           |
| <i>Comamonas testosteroni</i>                         | 1009852 | H1RRG1                             | 1                           | 2           | 1           | 1           | 1           | 1           | 1           | 1           | 1           |             | 1           | 1           | 1           |                               |                 |                        |              | 1            | 1           | 1           | 1           | 1          | 1           |

| Organism                                        | TaxID   | UniProt Entry of DpdA <sup>a</sup> | Genes in <i>dpd</i> cluster |             |             |             |             |             |             |             |             |             |             |             |             |             | Queosine genes not in cluster |                        |              |              |             |             |             |            |             |             |
|-------------------------------------------------|---------|------------------------------------|-----------------------------|-------------|-------------|-------------|-------------|-------------|-------------|-------------|-------------|-------------|-------------|-------------|-------------|-------------|-------------------------------|------------------------|--------------|--------------|-------------|-------------|-------------|------------|-------------|-------------|
|                                                 |         |                                    | <i>dpdA</i>                 | <i>dpdB</i> | <i>dpdC</i> | <i>dpdD</i> | <i>dpdE</i> | <i>dpdF</i> | <i>dpdH</i> | <i>dpdJ</i> | <i>dpdK</i> | <i>folE</i> | <i>queD</i> | <i>queE</i> | <i>queC</i> | <i>yhhQ</i> | <i>tgt-like</i>               | Other DBP <sup>b</sup> | <i>folE1</i> | <i>folE2</i> | <i>queD</i> | <i>queE</i> | <i>queC</i> | <i>tgt</i> | <i>yhhQ</i> | <i>queF</i> |
| ATCC 11996                                      |         |                                    |                             |             |             |             |             |             |             |             |             |             |             |             |             |             |                               |                        |              |              |             |             |             |            |             |             |
| <i>Herbaspirillum</i> sp. JC206                 | 1095769 | UPI000315EA36                      | 1*                          |             |             |             |             |             |             |             |             | 1           | 1           |             |             |             | 1                             | 6                      | 1            | 1            | 1           | 1           | 1           | 1          | 1           | 1           |
| <i>Aeromonas hydrophila</i> ML09-119            | 1288394 | UPI0002069B5B                      | 1                           | 1           | 1           | 1           | 1           | 1           | 1           | 1           |             | 1           | 1           | 1           |             |             |                               | 1                      |              |              | 1           | 1           | 1           | 1          | 1           |             |
| <i>Aeromonas veronii</i> B565                   | 998088  | UPI0002069B5B                      | 1                           | 1           | 1           | 1           | 1           | 1           | 1           | 1           |             | 1           |             | 1           |             |             |                               | 1                      |              |              | 1           | 1           | 1           | 1          | 1           |             |
| <i>Colwellia psychrerythraea</i> 34H            | 167879  | Q47ZY4                             | 1                           | 1           | 1           | 1           | 1           | 1           | 1           | 1           | 1           | 1           | 1           | 1           | 1           | 1           | 1                             | 2                      | 1            |              | 1           | 1           | 1           | 1          | 1           |             |
| <i>Ferrimonas balearica</i> DSM 9799            | 550540  | E1SVY3                             | 1                           | 1           | 1           | 1           | 1           | 1           | 1           | 1           | 1           |             | 1           | 1           | 1           |             |                               | 1                      | 1            | 1            | 1           | 1           | 1           | 1          | 1           |             |
| <i>Moritella dasanensis</i> ArB 0140            | 1201293 | UPI0002EB310B,<br>UPI0002F37F12    | 2                           | 2           | 1           | 1           |             | 1           | 1           | 1           | 1           | 1           | 1           | 1           | 1           | 1           | 1                             | 1                      |              |              | 1           | 1           | 1           | 1          | 2           |             |
| <i>Pseudoalteromonas spongiae</i> UST010723-006 | 1117319 | U1L931                             | 1                           | 1           | 1           | 1           |             | 1           | 1           | 1           | 1           |             | 1           |             | 1           |             |                               | 2                      |              |              | 1           | 1           | 1           | 1          | 1           |             |
| <i>Brenneria</i> sp. EniD312                    | 598467  | G7LP70                             | 1                           | 1           | 1           | 1           | 1           | 1           | 1           | 1           | 1           | 1           |             | 1           |             |             |                               | 1                      |              | 1            | 1           | 1           | 1           | 1          | 1           |             |
| <i>Cedecea davisae</i> DSM 4568                 | 566551  | UPI0003A830BE                      | 1                           | 1           | 1           | 1           | 1           | 1           | 1           | 1           | 1           |             |             |             |             |             |                               | 1                      | 1            | 1            | 1           | 1           | 1           | 1          | 1           |             |
| <i>Enterobacter cloacae</i> SCF1                | 701347  | E3GCE4                             | 1                           | 1           | 1           | 1           | 1           | 1           | 1           | 1           | 1           |             | 1           |             | 1           | 1           |                               | 1                      |              | 1            | 1           | 1           | 1           | 1          | 1           |             |
| <i>Escherichia coli</i> 3.2608                  | 869679  | I2TKQ1_ECOLX                       | 1                           | 1           | 1           | 1           | 1           | 1           | 1           | 1           | 1           |             | 1           |             |             |             |                               | 1                      |              | 1            | 1           | 1           | 1           | 1          | 1           |             |
| <i>Escherichia coli</i> 4.0967                  | 869687  | I2WPW9                             | 1                           | 1           | 1           | 1           | 1           | 1           | 1           | 1           | 1           |             | 1           |             |             |             |                               | 1                      |              | 1            | 1           | 1           | 1           | 1          | 1           |             |
| <i>Escherichia coli</i> 541-1                   | 752786  | I4TKI2                             | 1                           | 1           | 1           | 1           | 1           | 1           |             | 1           | 1           |             | 1           |             |             |             |                               | 1                      |              | 1            | 1           | 1           | 1           | 1          | 1           |             |
| <i>Escherichia coli</i> 93.0624                 | 869680  | I2U2E1                             | 1                           | 1           | 1           | 1           | 1           | 1           | 1           | 1           | 1           |             | 1           |             |             |             |                               | 1                      |              | 1            | 1           | 1           | 1           | 1          | 1           |             |
| <i>Escherichia coli</i> DEC11A                  | 868186  | H5GLG9                             | 1                           | 1           | 1           | 1           | 1           | 1           | 1           | 1           | 1           |             | 1           |             |             |             |                               | 1                      |              | 1            | 1           | 1           | 1           | 1          | 1           |             |

| Organism                                      | TaxID   | UniProt Entry of DpdA <sup>a</sup> | Genes in <i>dpd</i> cluster |             |             |             |             |             |             |             |             |             |             |             |             | Queosine genes not in cluster |                 |                        |              |              |             |             |             |            |             |             |
|-----------------------------------------------|---------|------------------------------------|-----------------------------|-------------|-------------|-------------|-------------|-------------|-------------|-------------|-------------|-------------|-------------|-------------|-------------|-------------------------------|-----------------|------------------------|--------------|--------------|-------------|-------------|-------------|------------|-------------|-------------|
|                                               |         |                                    | <i>dpdA</i>                 | <i>dpdB</i> | <i>dpdC</i> | <i>dpdD</i> | <i>dpdE</i> | <i>dpdF</i> | <i>dpdH</i> | <i>dpdJ</i> | <i>dpdK</i> | <i>folE</i> | <i>queD</i> | <i>queE</i> | <i>queC</i> | <i>yhhQ</i>                   | <i>tgt-like</i> | Other DBP <sup>b</sup> | <i>folE1</i> | <i>folE2</i> | <i>queD</i> | <i>queE</i> | <i>queC</i> | <i>tgt</i> | <i>yhhQ</i> | <i>queF</i> |
| <i>Escherichia coli</i> DEC11C                | 868188  | H5HGC4                             | 1                           | 1           | 1           | 1           | 1           | 1           | 1           | 1           | 1           | 1           | 1           | 1           | 1           | 1                             | 1               | 1                      | 1            | 1            | 1           | 1           | 1           | 1          | 1           | 1           |
| <i>Escherichia coli</i> DEC11D                | 868189  | H5HY49                             | 1                           | 1           | 1           | 1           | 1           | 1           | 1           | 1           | 1           | 1           | 1           | 1           | 1           | 1                             | 1               | 1                      | 1            | 1            | 1           | 1           | 1           | 1          | 1           | 1           |
| <i>Escherichia coli</i> DEC11E                | 868190  | H5ICF0                             | 1                           | 1           | 1           | 1           | 1           | 1           | 1           | 1           | 1           | 1           | 1           | 1           | 1           | 1                             | 1               | 1                      | 1            | 1            | 1           | 1           | 1           | 1          | 1           | 1           |
| <i>Escherichia coli</i> DEC14A                | 868201  | H5N2Q5                             | 1                           | 1           | 1           | 1           | 1           | 1           | 1           | 1           | 1           | 1           | 1           | 1           | 1           | 1                             | 1               | 1                      | 1            | 1            | 1           | 1           | 1           | 1          | 1           | 1           |
| <i>Escherichia coli</i> HM46                  | 1308982 | n.d.,<br>WP_00004031<br>8.1        | 1                           | 1           | 1           | 1           | 1           | 1           | 1           | 1           | 1           | 1           | 1           | 1           | 1           | 1                             | 1               | 1                      | 1            | 1            | 1           | 1           | 1           | 1          | 1           | 1           |
| <i>Escherichia coli</i> KTE136                | 1182719 | L4I0H9                             | 1                           | 1           | 1           | 1           | 1           | 1           | 1           | 1           | 1           | 1           | 1           | 1           | 1           | 1                             | 1               | 1                      | 1            | 1            | 1           | 1           | 1           | 1          | 1           | 1           |
| <i>Escherichia coli</i> KTE14                 | 1169333 | S0UY80                             | 1                           | 1           | 1           | 1           | 1           | 1           | 1           | 1           | 1           | 1           | 1           | 1           | 1           | 1                             | 1               | 1                      | 1            | 1            | 1           | 1           | 1           | 1          | 1           | 1           |
| <i>Escherichia coli</i> KTE176                | 1169401 | L5EC58                             | 1                           | 1           | 1           | 1           | 1           | 1           | 1           | 1           | 1           | 1           | 1           | 1           | 1           | 1                             | 1               | 1                      | 1            | 1            | 1           | 1           | 1           | 1          | 1           | 1           |
| <i>Escherichia coli</i> KTE227                | 1181773 | L4T3N4                             | 1                           | 1           | 1           | 1           | 1           | 1           | 1           | 1           | 1           | 1           | 1           | 1           | 1           | 1                             | 1               | 1                      | 1            | 1            | 1           | 1           | 1           | 1          | 1           | 1           |
| <i>Escherichia coli</i> KTE98                 | 1182698 | S1H135                             | 1                           | 1           | 1           | 1           | 1           | 1           | 1           | 1           | 1           | 1           | 1           | 1           | 1           | 1                             | 1               | 1                      | 1            | 1            | 1           | 1           | 1           | 1          | 1           | 1           |
| <i>Escherichia coli</i> NCCP15657             | 1169863 | n.d.,<br>WP_00004032<br>1.1        | 1                           | 1           | 1           | 1           | 1           | 1           | 1           | 1           | 1           | 1           | 1           | 1           | 1           | 1                             | 1               | 1                      | 1            | 1            | 1           | 1           | 1           | 1          | 1           | 1           |
| <i>Escherichia coli</i> E22                   | 340185  | B3I543                             | 1                           | 1           | 1           | 1           | 1           | 1           | 1           | 1           | 1           | 1           | 1           | 1           | 1           | 1                             | 1               | 1                      | 1            | 1            | 1           | 1           | 1           | 1          | 1           | 1           |
| <i>Escherichia coli</i> O103:H2 str. 12009    | 585395  | C8U0N1                             | 1                           | 1           | 1           | 1           | 1           | 1           | 1           | 1           | 1           | 1           | 1           | 1           | 1           | 1                             | 1               | 1                      | 1            | 1            | 1           | 1           | 1           | 1          | 1           | 1           |
| <i>Escherichia coli</i> O103:H2 str. CVM9450  | 1165941 | I4NG76                             | 1                           | 1           | 1           | 1           | 1           | 1           | 1           | 1           | 1           | 1           | 1           | 1           | 1           | 1                             | 1               | 1                      | 1            | 1            | 1           | 1           | 1           | 1          | 1           | 1           |
| <i>Escherichia coli</i> O45:H2 str. 03-EN-705 | 1078033 | n.d.,<br>KEU_RS01199<br>55         | 1                           | 1           | 1           | 1           | 1           | 1           | 1           | 1           | 1           | 1           | 1           | 1           | 1           | 1                             | 1               | 1                      | 1            | 1            | 1           | 1           | 1           | 1          | 1           | 1           |
| <i>Escherichia coli</i> P0299483.1            | 1125648 | N3LTF5                             | 1                           | 1           | 1           | 1           | 1           | 1           | 1           | 1           | 1           | 1           | 1           | 1           | 1           | 1                             | 1               | 1                      | 1            | 1            | 1           | 1           | 1           | 1          | 1           | 1           |

| Organism                            | TaxID   | UniProt Entry of DpdA <sup>a</sup> | Genes in <i>dpd</i> cluster |             |             |             |             |             |             |             |             |             |             |             |             | Queosine genes not in cluster |                 |                        |              |              |             |             |             |            |             |             |
|-------------------------------------|---------|------------------------------------|-----------------------------|-------------|-------------|-------------|-------------|-------------|-------------|-------------|-------------|-------------|-------------|-------------|-------------|-------------------------------|-----------------|------------------------|--------------|--------------|-------------|-------------|-------------|------------|-------------|-------------|
|                                     |         |                                    | <i>dpdA</i>                 | <i>dpdB</i> | <i>dpdC</i> | <i>dpdD</i> | <i>dpdE</i> | <i>dpdF</i> | <i>dpdH</i> | <i>dpdJ</i> | <i>dpdK</i> | <i>folE</i> | <i>queD</i> | <i>queE</i> | <i>queC</i> | <i>yhhQ</i>                   | <i>tgt-like</i> | Other DBP <sup>b</sup> | <i>folE1</i> | <i>folE2</i> | <i>queD</i> | <i>queE</i> | <i>queC</i> | <i>tgt</i> | <i>yhhQ</i> | <i>queF</i> |
| <i>Escherichia coli</i> P0299483.2  | 1125649 | N3N4S5                             | 1                           | 1           | 1           | 1           | 1           | 1           | 1           | 1           | 1           | 1           | 1           | 1           | 1           | 1                             | 1               | 1                      | 1            | 1            | 1           | 1           | 1           | 1          | 1           | 1           |
| <i>Escherichia coli</i> P0299483.3  | 1125650 | N3M0Z4                             | 1                           | 1           | 1           | 1           | 1           | 1           | 1           | 1           | 1           | 1           | 1           | 1           | 1           | 1                             | 1               | 1                      | 1            | 1            | 1           | 1           | 1           | 1          | 1           | 1           |
| <i>Escherichia coli</i> P0302293.10 | 1116079 | N3S1A9                             | 1                           | 1           | 1           | 1           | 1           | 1           | 1           | 1           | 1           | 1           | 1           | 1           | 1           | 1                             | 1               | 1                      | 1            | 1            | 1           | 1           | 1           | 1          | 1           | 1           |
| <i>Escherichia coli</i> P0302293.2  | 1116073 | N1SX55                             | 1                           | 1           | 1           | 1           | 1           | 1           | 1           | 1           | 1           | 1           | 1           | 1           | 1           | 1                             | 1               | 1                      | 1            | 1            | 1           | 1           | 1           | 1          | 1           | 1           |
| <i>Escherichia coli</i> P0302293.3  | 1116074 | N3QSH3                             | 1                           | 1           | 1           | 1           | 1           | 1           | 1           | 1           | 1           | 1           | 1           | 1           | 1           | 1                             | 1               | 1                      | 1            | 1            | 1           | 1           | 1           | 1          | 1           | 1           |
| <i>Escherichia coli</i> P0302293.4  | 1116075 | N3R2K6                             | 1                           | 1           | 1           | 1           | 1           | 1           | 1           | 1           | 1           | 1           | 1           | 1           | 1           | 1                             | 1               | 1                      | 1            | 1            | 1           | 1           | 1           | 1          | 1           | 1           |
| <i>Escherichia coli</i> P0302293.6  | 1116076 | N3RVF6                             | 1                           | 1           | 1           | 1           | 1           | 1           | 1           | 1           | 1           | 1           | 1           | 1           | 1           | 1                             | 1               | 1                      | 1            | 1            | 1           | 1           | 1           | 1          | 1           | 1           |
| <i>Escherichia coli</i> P0302293.7  | 1125643 | N3NYW1                             | 1                           | 1           | 1           | 1           | 1           | 1           | 1           | 1           | 1           | 1           | 1           | 1           | 1           | 1                             | 1               | 1                      | 1            | 1            | 1           | 1           | 1           | 1          | 1           | 1           |
| <i>Escherichia coli</i> P0302293.8  | 1116077 | N3SFA0                             | 1                           | 1           | 1           | 1           | 1           | 1           | 1           | 1           | 1           | 1           | 1           | 1           | 1           | 1                             | 1               | 1                      | 1            | 1            | 1           | 1           | 1           | 1          | 1           | 1           |
| <i>Escherichia coli</i> P0302293.9  | 1116078 | N3T1M3                             | 1                           | 1           | 1           | 1           | 1           | 1           | 1           | 1           | 1           | 1           | 1           | 1           | 1           | 1                             | 1               | 1                      | 1            | 1            | 1           | 1           | 1           | 1          | 1           | 1           |
| <i>Escherichia coli</i> P0302308.1  | 1116153 | M9FY36                             | 1                           | 1           | 1           | 1           | 1           | 1           | 1           | 1           | 1           | 1           | 1           | 1           | 1           | 1                             | 1               | 1                      | 1            | 1            | 1           | 1           | 1           | 1          | 1           | 1           |
| <i>Escherichia coli</i> P0302308.10 | 1116158 | N3FVR4                             | 1                           | 1           | 1           | 1           | 1           | 1           | 1           | 1           | 1           | 1           | 1           | 1           | 1           | 1                             | 1               | 1                      | 1            | 1            | 1           | 1           | 1           | 1          | 1           | 1           |
| <i>Escherichia coli</i> P0302308.11 | 1116159 | N3G3K7                             | 1                           | 1           | 1           | 1           | 1           | 1           | 1           | 1           | 1           | 1           | 1           | 1           | 1           | 1                             | 1               | 1                      | 1            | 1            | 1           | 1           | 1           | 1          | 1           | 1           |
| <i>Escherichia coli</i> P0302308.12 | 1116160 | N4PX35                             | 1                           | 1           | 1           | 1           | 1           | 1           | 1           | 1           | 1           | 1           | 1           | 1           | 1           | 1                             | 1               | 1                      | 1            | 1            | 1           | 1           | 1           | 1          | 1           | 1           |
| <i>Escherichia coli</i> P0302308.13 | 1116161 | N4R2E0                             | 1                           | 1           | 1           | 1           | 1           | 1           | 1           | 1           | 1           | 1           | 1           | 1           | 1           | 1                             | 1               | 1                      | 1            | 1            | 1           | 1           | 1           | 1          | 1           | 1           |
| <i>Escherichia coli</i> P0302308.14 | 1116162 | N4PYS3                             | 1                           | 1           | 1           | 1           | 1           | 1           | 1           | 1           | 1           | 1           | 1           | 1           | 1           | 1                             | 1               | 1                      | 1            | 1            | 1           | 1           | 1           | 1          | 1           | 1           |
| <i>Escherichia coli</i> P0302308.2  | 1116154 | N3GRS0                             | 1                           | 1           | 1           | 1           | 1           | 1           | 1           | 1           | 1           | 1           | 1           | 1           | 1           | 1                             | 1               | 1                      | 1            | 1            | 1           | 1           | 1           | 1          | 1           | 1           |
| <i>Escherichia coli</i> P0302308.3  | 1116155 | N3GD14                             | 1                           | 1           | 1           | 1           | 1           | 1           | 1           | 1           | 1           | 1           | 1           | 1           | 1           | 1                             | 1               | 1                      | 1            | 1            | 1           | 1           | 1           | 1          | 1           | 1           |

| Organism                                      | TaxID   | UniProt Entry of DpdA <sup>a</sup> | Genes in <i>dpd</i> cluster |             |             |             |             |             |             |             |             |             |             |             |             | Queosine genes not in cluster |                 |                        |              |              |             |             |             |            |             |             |
|-----------------------------------------------|---------|------------------------------------|-----------------------------|-------------|-------------|-------------|-------------|-------------|-------------|-------------|-------------|-------------|-------------|-------------|-------------|-------------------------------|-----------------|------------------------|--------------|--------------|-------------|-------------|-------------|------------|-------------|-------------|
|                                               |         |                                    | <i>dpdA</i>                 | <i>dpdB</i> | <i>dpdC</i> | <i>dpdD</i> | <i>dpdE</i> | <i>dpdF</i> | <i>dpdH</i> | <i>dpdJ</i> | <i>dpdK</i> | <i>folE</i> | <i>queD</i> | <i>queE</i> | <i>queC</i> | <i>yhhQ</i>                   | <i>tgt-like</i> | Other DBP <sup>b</sup> | <i>folE1</i> | <i>folE2</i> | <i>queD</i> | <i>queE</i> | <i>queC</i> | <i>tgt</i> | <i>yhhQ</i> | <i>queF</i> |
| <i>Escherichia coli</i> P0302308.4            | 1116156 | N3IIZ2                             | 1                           | 1           | 1           | 1           | 1           | 1           | 1           | 1           | 1           | 1           | 1           | 1           | 1           | 1                             | 1               | 1                      | 1            | 1            | 1           | 1           | 1           | 1          | 1           | 1           |
| <i>Escherichia coli</i> P0302308.5            | 1116157 | N3HPT9                             | 1                           | 1           | 1           | 1           | 1           | 1           | 1           | 1           | 1           | 1           | 1           | 1           | 1           | 1                             | 1               | 1                      | 1            | 1            | 1           | 1           | 1           | 1          | 1           | 1           |
| <i>Escherichia coli</i> TA124                 | 656435  | H1FHW2                             | 1                           | 1           |             | 1           | 1           | 1           |             | 1           | 1           |             | 1           |             | 1           |                               |                 |                        |              |              |             |             |             |            |             |             |
| <i>Escherichia coli</i> TA271                 | 656443  | F4UWR1                             | 1                           | 1           | 1           | 1           | 1           | 1           | 1           | 1           | 1           | 1           | 1           | 1           | 1           | 1                             | 1               | 1                      | 1            | 1            | 1           | 1           | 1           | 1          | 1           | 1           |
| <i>Salmonella enterica</i> serovar Montevideo | 745015  | E7V8J4                             | 1                           | 1           | 1           | 1           | 1           | 1           | 1           | 1           | 1           | 1           | 1           | 1           | 1           | 1                             | 1               | 1                      | 1            | 1            | 1           | 1           | 1           | 1          | 1           | 1           |
| <i>Salmonella enterica</i> serovar Montevideo | 749951  | E7Y6L7                             | 1                           | 1           | 1           | 1           | 1           | 1           | 1           | 1           | 1           | 1           | 1           | 1           | 1           | 1                             | 1               | 1                      | 1            | 1            | 1           | 1           | 1           | 1          | 1           | 1           |
| <i>Salmonella enterica</i> serovar Montevideo | 871591  | E8DZP3                             | 1                           | 1           | 1           | 1           | 1           | 1           | 1           | 1           | 1           | 1           | 1           | 1           | 1           | 1                             | 1               | 1                      | 1            | 1            | 1           | 1           | 1           | 1          | 1           | 1           |
| <i>Salmonella enterica</i> serovar Montevideo | 871587  | n.d., SEEM0077_RS0123085           | 1                           | 1           | 1           | 1           | 1           | 1           | 1           | 1           | 1           | 1           | 1           | 1           | 1           | 1                             | 1               | 1                      | 1            | 1            | 1           | 1           | 1           | 1          | 1           | 1           |
| <i>Salmonella enterica</i> serovar Montevideo | 859199  | A0A023N8U6                         | 1                           | 1           | 1           | 1           | 1           | 1           | 1           | 1           | 1           | 1           | 1           | 1           | 1           | 1                             | 1               | 1                      | 1            | 1            | 1           | 1           | 1           | 1          | 1           | 1           |
| <i>Salmonella enterica</i> serovar Montevideo | 858317  | n.d., WP_001542917.1               | 1                           | 1           | 1           | 1           | 1           | 1           | 1           | 1           | 1           | 1           | 1           | 1           | 1           | 1                             | 1               | 1                      | 1            | 1            | 1           | 1           | 1           | 1          | 1           | 1           |
| <i>Salmonella enterica</i> serovar Montevideo | 871588  | E8D877                             | 1                           | 1           | 1           | 1           | 1           | 1           | 1           | 1           | 1           | 1           | 1           | 1           | 1           | 1                             | 1               | 1                      | 1            | 1            | 1           | 1           | 1           | 1          | 1           | 1           |
| <i>Salmonella enterica</i> serovar Montevideo | 745020  | E7WSI3                             | 1                           | 1           | 1           | 1           | 1           | 1           | 1           | 1           | 1           | 1           | 1           | 1           | 1           | 1                             | 1               | 1                      | 1            | 1            | 1           | 1           | 1           | 1          | 1           | 1           |
| <i>Salmonella enterica</i> serovar Montevideo | 871589  | E8DB61                             | 1                           | 1           | 1           | 1           | 1           | 1           | 1           | 1           | 1           | 1           | 1           | 1           | 1           | 1                             | 1               | 1                      | 1            | 1            | 1           | 1           | 1           | 1          | 1           | 1           |
| <i>Salmonella enterica</i> serovar Montevideo | 745017  | E7VPX7                             | 1                           | 1           | 1           | 1           | 1           | 1           | 1           | 1           | 1           | 1           | 1           | 1           | 1           | 1                             | 1               | 1                      | 1            | 1            | 1           | 1           | 1           | 1          | 1           | 1           |
| <i>Salmonella enterica</i> serovar Montevideo | 882865  | E8FQ96                             | 1                           | 1           | 1           | 1           | 1           | 1           | 1           | 1           | 1           | 1           | 1           | 1           | 1           | 1                             | 1               | 1                      | 1            | 1            | 1           | 1           | 1           | 1          | 1           | 1           |

| Organism                                      | TaxID  | UniProt Entry of DpdA <sup>a</sup> | Genes in <i>dpd</i> cluster |             |             |             |             |             |             |             |             |             |             |             |             | Queosine genes not in cluster |                 |                        |              |              |             |             |             |            |             |             |
|-----------------------------------------------|--------|------------------------------------|-----------------------------|-------------|-------------|-------------|-------------|-------------|-------------|-------------|-------------|-------------|-------------|-------------|-------------|-------------------------------|-----------------|------------------------|--------------|--------------|-------------|-------------|-------------|------------|-------------|-------------|
|                                               |        |                                    | <i>dpdA</i>                 | <i>dpdB</i> | <i>dpdC</i> | <i>dpdD</i> | <i>dpdE</i> | <i>dpdF</i> | <i>dpdH</i> | <i>dpdJ</i> | <i>dpdK</i> | <i>folE</i> | <i>queD</i> | <i>queE</i> | <i>queC</i> | <i>yhhQ</i>                   | <i>tgt-like</i> | Other DBP <sup>b</sup> | <i>folE1</i> | <i>folE2</i> | <i>queD</i> | <i>queE</i> | <i>queC</i> | <i>tgt</i> | <i>yhhQ</i> | <i>queF</i> |
| <i>Salmonella enterica</i> serovar Montevideo | 766762 | E7Z4F9                             | 1                           | 1           | 1           | 1           | 1           | 1           | 1           | 1           | 1           | 1           | 1           | 1           | 1           | 1                             | 1               | 1                      | 1            | 1            | 1           | 1           | 1           | 1          | 1           | 1           |
| <i>Salmonella enterica</i> serovar Montevideo | 749949 | E7XRG5                             | 1                           | 1           | 1           | 1           | 1           | 1           | 2           | 1           | 1           | 1           | 1           | 1           | 1           | 1                             | 1               | 1                      | 1            | 1            | 1           | 1           | 1           | 1          | 1           | 1           |
| <i>Salmonella enterica</i> serovar Montevideo | 882866 | n.d., EGA47221.1                   | 1                           | 1           | 1           | 1           | 1           | 1           | 1           | 1           | 1           | 1           | 1           | 1           | 1           | 1                             | 1               | 1                      | 1            | 1            | 1           | 1           | 1           | 1          | 1           | 1           |
| <i>Salmonella enterica</i> serovar Montevideo | 882869 | E8GVX4                             | 1                           | 1           | 1           | 1           | 1           | 1           | 1           | 1           | 1           | 1           | 1           | 1           | 1           | 1                             | 1               | 1                      | 1            | 1            | 1           | 1           | 1           | 1          | 1           | 1           |
| <i>Salmonella enterica</i> serovar Montevideo | 789332 | n.d., EFY62506.1                   | 1                           | 1           | 1           | 1           | 1           | 1           | 1           | 1           | 1           | 1           | 1           | 1           | 1           | 1                             | 1               | 1                      | 1            | 1            | 1           | 1           | 1           | 1          | 1           | 1           |
| <i>Salmonella enterica</i> serovar Montevideo | 871593 | n.d., EGA25998.1                   | 1                           | 1           | 1           | 1           | 1           | 1           | 1           | 1           | 1           | 1           | 1           | 1           | 1           | 1                             | 1               | 1                      | 1            | 1            | 1           | 1           | 1           | 1          | 1           | 1           |
| <i>Salmonella enterica</i> serovar Montevideo | 858318 | n.d., EFZ82503.1                   | 1                           | 1           | 1           | 1           | 1           | 1           | 1           | 1           | 1           | 1           | 1           | 1           | 1           | 1                             | 1               | 1                      | 1            | 1            | 1           | 1           | 1           | 1          | 1           | 1           |
| <i>Salmonella enterica</i> serovar Montevideo | 745018 | n.d., EFY18721.1                   | 1                           | 1           | 1           | 1           | 1           | 1           | 1           | 1           | 1           | 1           | 1           | 1           | 1           | 1                             | 1               | 1                      | 1            | 1            | 1           | 1           | 1           | 1          | 1           | 1           |
| <i>Salmonella enterica</i> serovar Montevideo | 882863 | n.d., EGA31819.1                   | 1                           | 1           | 1           | 1           | 1           | 1           | 1           | 1           | 1           | 1           | 1           | 1           | 1           | 1                             | 1               | 1                      | 1            | 1            | 1           | 1           | 1           | 1          | 1           | 1           |
| <i>Salmonella enterica</i> serovar Montevideo | 882867 | n.d., EGA49200.1                   | 1                           | 1           | 1           | 1           | 1           | 1           | 1           | 1           | 1           | 1           | 1           | 1           | 1           | 1                             | 1               | 1                      | 1            | 1            | 1           | 1           | 1           | 1          | 1           | 1           |
| <i>Salmonella enterica</i> serovar Montevideo | 745021 | n.d., EFY34580.1                   | 1                           | 1           | 1           | 1           | 1           | 1           | 1           | 1           | 1           | 1           | 1           | 1           | 1           | 1                             | 1               | 1                      | 1            | 1            | 1           | 1           | 1           | 1          | 1           | 1           |
| <i>Salmonella enterica</i> serovar Montevideo | 882864 | n.d., EGA35350.1                   | 1                           | 1           | 1           | 1           | 1           | 1           | 1           | 1           | 1           | 1           | 1           | 1           | 1           | 1                             | 1               | 1                      | 1            | 1            | 1           | 1           | 1           | 1          | 1           | 1           |
| <i>Salmonella enterica</i> serovar Montevideo | 871590 | E8DXF6                             | 1                           | 1           | 1           | 1           | 1           | 1           | 1           | 1           | 1           | 1           | 1           | 1           | 1           | 1                             | 1               | 1                      | 1            | 1            | 1           | 1           | 1           | 1          | 1           | 1           |
| <i>Salmonella enterica</i> serovar Montevideo | 871592 | E8ED74                             | 1                           | 1           | 1           | 1           | 1           | 1           | 1           | 1           | 1           | 1           | 1           | 1           | 1           | 1                             | 1               | 1                      | 1            | 1            | 1           | 1           | 1           | 1          | 1           | 1           |
| <i>Salmonella enterica</i> serovar Montevideo | 749950 | n.d., EFY47421.1                   | 1                           | 1           | 1           | 1           | 1           | 1           | 1           | 1           | 1           | 1           | 1           | 1           | 1           | 1                             | 1               | 1                      | 1            | 1            | 1           | 1           | 1           | 1          | 1           | 1           |
| <i>Salmonella enterica</i> serovar Montevideo | 745019 | n.d.,                              | 1                           | 1           | 1           | 1           | 1           | 1           | 1           | 1           | 1           | 1           | 1           | 1           | 1           | 1                             | 1               | 1                      | 1            | 1            | 1           | 1           | 1           | 1          | 1           | 1           |

| Organism                                                             | TaxID  | UniProt Entry of DpdA <sup>a</sup> | Genes in <i>dpd</i> cluster |             |             |             |             |             |             |             |             |             |             |             |             | Queosine genes not in cluster |                 |                        |              |              |             |             |             |            |             |             |
|----------------------------------------------------------------------|--------|------------------------------------|-----------------------------|-------------|-------------|-------------|-------------|-------------|-------------|-------------|-------------|-------------|-------------|-------------|-------------|-------------------------------|-----------------|------------------------|--------------|--------------|-------------|-------------|-------------|------------|-------------|-------------|
|                                                                      |        |                                    | <i>dpdA</i>                 | <i>dpdB</i> | <i>dpdC</i> | <i>dpdD</i> | <i>dpdE</i> | <i>dpdF</i> | <i>dpdH</i> | <i>dpdJ</i> | <i>dpdK</i> | <i>folE</i> | <i>queD</i> | <i>queE</i> | <i>queC</i> | <i>yhhQ</i>                   | <i>tgt-like</i> | Other DBP <sup>b</sup> | <i>folE1</i> | <i>folE2</i> | <i>queD</i> | <i>queE</i> | <i>queC</i> | <i>tgt</i> | <i>yhhQ</i> | <i>queF</i> |
| Montevideo                                                           |        | EFY24387.1                         |                             |             |             |             |             |             |             |             |             |             |             |             |             |                               |                 |                        |              |              |             |             |             |            |             |             |
| <i>Salmonella enterica</i> serovar<br>Montevideo str. 19N            | 763919 | n.d.,<br>EFY56108.1                | 1                           | 1           | 1           | 1           | 1           | 1           | 1           | 1           | 1           | 1           | 1           | 1           | 1           | 1                             | 1               | 1                      | 1            | 1            | 1           | 1           | 1           | 1          | 1           | 1           |
| <i>Salmonella enterica</i> serovar<br>Montevideo str. 366867         | 858314 | n.d.,<br>EFY72248.1                | 1                           | 1           | 1           | 1           | 1           | 1           | 1           | 1           | 1           | 1           | 1           | 1           | 1           | 1                             | 1               | 1                      | 1            | 1            | 1           | 1           | 1           | 1          | 1           | 1           |
| <i>Salmonella enterica</i> serovar<br>Montevideo str. 413180         | 858315 | n.d.,<br>EFY76699.1                | 1                           | 1           | 1           | 1           | 1           | 1           | 1           | 1           | 1           | 1           | 1           | 1           | 1           | 1                             | 1               | 1                      | 1            | 1            | 1           | 1           | 1           | 1          | 1           | 1           |
| <i>Salmonella enterica</i> serovar<br>Montevideo str. 414877         | 858313 | n.d.,<br>EFY68858.1                | 1                           | 1           | 1           | 1           | 1           | 1           | 1           | 1           | 1           | 1           | 1           | 1           | 1           | 1                             | 1               | 1                      | 1            | 1            | 1           | 1           | 1           | 1          | 1           | 1           |
| <i>Salmonella enterica</i> serovar<br>Montevideo str. 42N            | 763921 | G9V749                             | 1                           | 1           | 1           | 1           | 1           | 1           | 1           | 1           | 1           | 1           | 1           | 1           | 1           | 1                             | 1               | 1                      | 1            | 1            | 1           | 1           | 1           | 1          | 1           | 1           |
| <i>Salmonella enterica</i> serovar<br>Montevideo str. 4441 H         | 766761 | n.d.,<br>EHL61016.1                | 1                           | 1           | 1           | 1           | 1           | 1           | 1           | 1           | 1           | 1           | 1           | 1           | 1           | 1                             | 1               | 1                      | 1            | 1            | 1           | 1           | 1           | 1          | 1           | 1           |
| <i>Salmonella enterica</i> serovar<br>Montevideo str. 556152         | 871586 | E8CAZ9                             | 1                           | 1           | 1           | 1           | 1           | 1           | 1           | 1           | 1           | 1           | 1           | 1           | 1           | 1                             | 1               | 1                      | 1            | 1            | 1           | 1           | 1           | 1          | 1           | 1           |
| <i>Salmonella enterica</i> serovar<br>Montevideo str. 609460         | 859198 | n.d.,<br>EFZ86583.1                | 1                           | 1           | 1           | 1           | 1           | 1           | 1           | 1           | 1           | 1           | 1           | 1           | 1           | 1                             | 1               | 1                      | 1            | 1            | 1           | 1           | 1           | 1          | 1           | 1           |
| <i>Salmonella enterica</i> serovar<br>Montevideo str. 80959-06       | 763922 | H0L381                             | 1                           | 1           | 1           | 1           | 1           | 1           | 1           | 1           | 1           | 1           | 1           | 1           | 1           | 1                             | 1               | 1                      | 1            | 1            | 1           | 1           | 1           | 1          | 1           | 1           |
| <i>Salmonella enterica</i> serovar<br>Montevideo str.<br>CT_02035278 | 984240 | n.d.,<br>EHN33861.1                | 1                           | 1           | 1           | 1           | 1           | 1           | 1           | 2           | 1           | 1           | 1           | 1           | 1           | 1                             | 1               | 1                      | 1            | 1            | 1           | 1           | 1           | 1          | 1           | 1           |
| <i>Salmonella enterica</i> serovar<br>Montevideo str.<br>CT_02035318 | 984241 | n.d.,<br>EHN21388.1                | 1                           | 1           | 1           | 1           | 1           | 1           | 1           | 1           | 1           | 1           | 1           | 1           | 1           | 1                             | 1               | 1                      | 1            | 1            | 1           | 1           | 1           | 1          | 1           | 1           |
| <i>Salmonella enterica</i> serovar<br>Montevideo str.<br>CT_02035320 | 984242 | n.d.,<br>EHN31461.1                | 1                           | 1           | 1           | 1           | 1           | 1           | 1           | 1           | 1           | 1           | 1           | 1           | 1           | 1                             | 1               | 1                      | 1            | 1            | 1           | 1           | 1           | 1          | 1           | 1           |
| <i>Salmonella enterica</i> serovar<br>Montevideo str.<br>CT_02035321 | 882860 | H0MIU4                             | 1                           | 1           | 1           | 1           | 1           | 1           | 1           | 1           | 1           | 1           | 1           | 1           | 1           | 1                             | 1               | 1                      | 1            | 1            | 1           | 1           | 1           | 1          | 1           | 1           |

| Organism                                                         | TaxID   | UniProt Entry of DpdA <sup>a</sup> | Genes in <i>dpd</i> cluster |             |             |             |             |             |             |             |             |             |             |             |             | Queosine genes not in cluster |                 |                        |              |              |             |             |             |            |             |             |
|------------------------------------------------------------------|---------|------------------------------------|-----------------------------|-------------|-------------|-------------|-------------|-------------|-------------|-------------|-------------|-------------|-------------|-------------|-------------|-------------------------------|-----------------|------------------------|--------------|--------------|-------------|-------------|-------------|------------|-------------|-------------|
|                                                                  |         |                                    | <i>dpdA</i>                 | <i>dpdB</i> | <i>dpdC</i> | <i>dpdD</i> | <i>dpdE</i> | <i>dpdF</i> | <i>dpdH</i> | <i>dpdJ</i> | <i>dpdK</i> | <i>folE</i> | <i>queD</i> | <i>queE</i> | <i>queC</i> | <i>yhhQ</i>                   | <i>tgt-like</i> | Other DBP <sup>b</sup> | <i>folE1</i> | <i>folE2</i> | <i>queD</i> | <i>queE</i> | <i>queC</i> | <i>tgt</i> | <i>yhhQ</i> | <i>queF</i> |
| <i>Salmonella enterica</i> serovar Montevideo str. CT_02035327   | 882862  | H0MXB4                             | 1                           | 1           | 1           | 1           | 1           | 1           | 1           | 1           | 1           | 1           | 1           | 1           | 1           | 1                             | 1               | 1                      | 1            | 1            | 1           | 1           | 1           | 1          | 1           | 1           |
| <i>Salmonella enterica</i> serovar Montevideo str. IA_2010008286 | 882868  | n.d., EHP21752.1                   | 1                           | 1           | 1           | 1           | 1           | 1           | 1           | 1           | 1           | 1           | 1           | 1           | 1           | 1                             | 1               | 1                      | 1            | 1            | 1           | 1           | 1           | 1          | 1           | 1           |
| <i>Salmonella enterica</i> serovar Montevideo str. SARB31        | 749952  | n.d., EHL39173.1                   | 1                           | 1           | 1           | 1           | 1           | 1           | 1           | 1           | 1           | 1           | 1           | 1           | 1           | 1                             | 1               | 1                      | 1            | 1            | 1           | 1           | 1           | 1          | 1           | 1           |
| <i>Salmonella enterica</i> serovar Tennessee str. CDC07-0191     | 573395  | n.d., ZP_04654487.1                | 1                           | 1           | 1           | 1           | 1           | 1           | 1           | 1           | 1           | 1           | 1           | 1           | 1           | 1                             | 1               | 1                      | 1            | 1            | 1           | 1           | 1           | 1          | 1           | 1           |
| <i>Vibrio cyclitrophicus</i> ZF99                                | 1136170 | UPI0002FEF6E0, UPI00031DBF90       | 2                           | 2           | 1           | 1           | 1           | 1           | 1           | 1           | 1           | 1           | 1           | 1           | 1           | 1                             | 1               | 1                      | 1            | 1            | 1           | 1           | 1           | 1          | 1           | 1           |
| <i>Stigmatella aurantiaca</i> DW4/3-1                            | 378806  | E3FUF0                             | 1                           | 1           | 1           | 1           | 1           | 1           | 1           | 1           | 1           | 1           | 1           | 1           | 1           | 1                             | 1               | 1                      | 1            | 1            | 1           | 1           | 1           | 1          | 1           | 1           |

Number indicates number of genes present. \* indicates presence of long version of *dpdA*.

<sup>a</sup> UniProt entry given when available. n.d. indicates entry was not found in UniProt. When available, the RefSeq entry or locus tag is given.

<sup>b</sup> Other DBP: Other predicted DNA binding and processing proteins.



**Table S2.** HHpred predictions for *S. Montevideo* DpdA-DpdK proteins.

| Query   |              | HHpred result |                                                                  |                                 |          |          |          |         |         |              |
|---------|--------------|---------------|------------------------------------------------------------------|---------------------------------|----------|----------|----------|---------|---------|--------------|
| Protein | Residues     | PFAM          | Description                                                      | Probability                     | E-value  | P-value  | Score    | Aligned | Query   | Template     |
| DpdA    | total (417)  | PF01702       | TGT: Queueine tRNA-ribosyltransferase                            | 100                             | 3.00E-39 | 1.80E-43 | 303.6    | 210     | 113-415 | 1-215 (223)  |
| DpdB    | total (376)  | PF14072       | DndB: DNA-sulfur modification-associated protein                 | 100                             | 8.90E-52 | 5.50E-56 | 403.1    | 316     | 6-367   | 1-343 (346)  |
| DpdC    | total (319)  | PF03883       | DUF328: Protein of unknown function (DUF328)                     | 98.7                            | 1.00E-07 | 6.30E-12 | 85.6     | 150     | 34-232  | 53-211 (233) |
|         | 230-319      | PF08069       | Ribosomal_S13_N: Ribosomal S13/S15 N-terminal domain             | 80.6                            | 1.4      | 8.90E-05 | 26       | 31      | 39-71   | 29-60 (60)   |
| DpdD    | total (724)  | PF10087       | DUF2325: Uncharacterized protein conserved in bacteria (DUF2325) | 96.1                            | 0.0095   | 5.90E-07 | 50.3     | 89      | 632-720 | 1-93 (94)    |
|         | 1-600        | no result     |                                                                  |                                 |          |          |          |         |         |              |
| DpdE    | total (927)  | PF12137       | RapA_C: RNA polymerase recycling family C-terminal               | 100                             | 4.20E-33 | 2.60E-37 | 297.8    | 316     | 564-916 | 1-322 (360)  |
|         |              | PF00176       | SNF2_N: SNF2 family N-terminal domain                            | 99.9                            | 2.60E-27 | 1.60E-31 | 257.8    | 225     | 78-328  | 1-272 (307)  |
|         |              | PF00271       | Helicase_C: Helicase conserved C-terminal domain                 | 99.5                            | 1.30E-14 | 8.30E-19 | 129.5    | 94      | 453-556 | 4-105 (105)  |
| DpdF    | total (817)  | PF00270       | DEAD: DEAD/DEAH box helicase                                     | 99.8                            | 2.30E-20 | 1.40E-24 | 182.2    | 170     | 139-324 | 1-175 (175)  |
|         |              | PF00271       | Helicase_C: Helicase conserved C-terminal domain                 | 99.7                            | 1.30E-17 | 8.30E-22 | 147.7    | 105     | 359-469 | 1-105 (105)  |
|         |              | 500-817       | PF16124                                                          | RecQ_Zn_bind: RecQ zinc-binding | 89.6     | 0.35     | 2.20E-05 | 33.4    | 45      | 117-164      |
| DpdG    | total (300)  | PF09821       | AAA_assoc_C: C-terminal AAA-associated domain                    | 94.3                            | 0.13     | 7.80E-06 | 40.3     | 98      | 53-178  | 12-116 (119) |
|         | 200-300      | PF00538       | Linker_histone: linker histone H1 and H5 family                  | 79.1                            | 0.98     | 6.10E-05 | 26       | 53      | 9-67    | 8-60 (73)    |
| DpdH    | total (1049) | PF10923       | DUF2791: P-loop Domain of unknown function (DUF2791)             | 97.7                            | 0.00091  | 5.60E-08 | 74.2     | 329     | 68-524  | 53-407 (414) |
|         | 550-1049     | PF08397       | IMD: IRSp53/MIM homology domain                                  | 74                              | 9.6      | 0.00059  | 33.8     | 76      | 424-499 | 10-85 (219)  |
|         | 550-950      | PF14276       | DUF4363: Domain of unknown function (DUF4363)                    | 70.8                            | 19       | 0.0012   | 26.5     | 89      | 279-385 | 27-116 (120) |
|         | 550-800      | no result     |                                                                  |                                 |          |          |          |         |         |              |

| Query   |              | HHpred result |                                                                                  |             |          |          |       |         |         |              |
|---------|--------------|---------------|----------------------------------------------------------------------------------|-------------|----------|----------|-------|---------|---------|--------------|
| Protein | Residues     | PFAM          | Description                                                                      | Probability | E-value  | P-value  | Score | Aligned | Query   | Template     |
| DpdI    | total (245)  | PF03999       | MAP65_ASE1: Microtubule associated protein (MAP65/ASE1 family)                   | 89.9        | 4.8      | 0.00029  | 37.1  | 182     | 3-223   | 65-253 (598) |
| DpdJ    | total (1506) | PF00270       | DEAD: DEAD/DEAH box helicase                                                     | 99.8        | 2.40E-18 | 1.50E-22 | 182.1 | 171     | 159-430 | 1-175 (175)  |
|         |              | PF00271       | Helicase_C: Helicase conserved C-terminal domain                                 | 99.4        | 6.10E-13 | 3.80E-17 | 127.9 | 105     | 480-636 | 1-105 (105)  |
|         | 700-1506     | PF09369       | DUF1998: Domain of unknown function (DUF1998); DEAD/DEAH-box family of helicases | 92.1        | 0.12     | 7.20E-06 | 42.5  | 64      | 477-552 | 1-64 (80)    |
|         | 700-800      | no result     |                                                                                  |             |          |          |       |         |         |              |
| DpdK    | total (182)  | PF13091       | PLDc_2: Phospholipase D-like domain                                              | 99.9        | 1.80E-24 | 1.10E-28 | 152.4 | 122     | 49-172  | 2-134 (134)  |

**Table S3.** Strains used in this study

| Strain name                                                                           | Genotype / Relevant Characteristics                                                                    | Reference / Source |
|---------------------------------------------------------------------------------------|--------------------------------------------------------------------------------------------------------|--------------------|
| <i>Salmonella enterica</i> subspecies <i>enterica</i> serovar Montevideo ATCC BAA-710 | Wild type                                                                                              | (31)/Max Tepliski  |
| YYF3020                                                                               | <i>S. Montevideo</i> $\Delta$ <i>tgt</i> ::kan; kan <sup>R</sup>                                       | This study         |
| YYF3022                                                                               | <i>S. Montevideo</i> $\Delta$ <i>dpdC-dpdD</i> ::kan; 20-kb deletion of gene cluster; kan <sup>R</sup> | This study         |
| <i>Kineococcus radiotolerans</i>                                                      | Wild type                                                                                              | (32)/John Battista |
| <i>Comamonas testosteroni</i> ATCC 11996                                              | Wild type                                                                                              | (33)/DSMZ          |
| <i>Ferrimonas balearica</i> DSM 9799                                                  | Wild type                                                                                              | (34)/ DSMZ         |
| <i>Meiothermus chliarophilus</i> DSM 9957                                             | Wild type                                                                                              | (35)/DSMZ          |
| <i>Sphingopyxis alaskensis</i> RB2256                                                 | Wild type                                                                                              | (36)/DSMZ          |
| <i>Escherichia coli</i> C600                                                          | F- <i>tonA21 thi-1 thr-1 leuB6 lacY1 glnV44 rfbC1 fhuA1</i> $\lambda$ -                                | (37)               |

**Table S4.** Oligonucleotides used in this study

| <b>Name</b>        | <b>Sequence 5'-3'</b>                                                |
|--------------------|----------------------------------------------------------------------|
| cl2in-F            | CGCAACGTGGTCAACTTCT                                                  |
| cl2in-R            | GCCGCTATCACGAAAGACA                                                  |
| tgtA5in-F          | CGAGCATCGCGTTCGTCAGC                                                 |
| tgtA5in-R          | CGATCGCCCAAAGTACGTTCG                                                |
| cl1in-F            | ATGAGTGAGTTCGGTGTCCC                                                 |
| cl1in-R            | GTTGCGAGGCTTCTTATCCC                                                 |
| SM1830-F           | CTGATTATCCGTTCCGGGCGAC                                               |
| SM1830-R           | CAGCATGTGCGGGGTACACAG                                                |
| SM1832-F           | GTGGCAATTACCAACAACGCTG                                               |
| SM1832-R           | TCATTTTCTTGCCCCCCTGG                                                 |
| cl3in-F            | TGGGTTCCGCTGACACTACTC                                                |
| cl3in-R            | GCGTTTCGCTGAAGGTTGAT                                                 |
| Tn5-F              | GGATGGAAGCCGGTCTTGTCGATCAGGAT                                        |
| SM1839-R           | CTTCAAACCTACGCTGGATAGGC                                              |
| tgtA5out-up        | GAATATCGTGCTCACTAGACTG                                               |
| SM-tgt-out-F       | GTAACGGTTGCAGCGGGAAC                                                 |
| SM-tgt-out-R       | GAAATCACCAGGTCACGATG                                                 |
| SM-tgt-in-F        | CGCGGTCGTCTGGTGTTTG                                                  |
| SM-tgt-in-R        | CGAAGCTCTCTAATTTACCCTC                                               |
| SMclus2-deletion-F | GTGAGCCAAATTAATCTGATAACAACATGTACAAATG<br>GTAAGGTGTAGGCTGGAGCTGCTTCG  |
| SMclus3-deletion-R | TCAATCCAGCGCACTGACGAAGGCTGCGATCATACTC<br>GATGGTCCATATGAATATCCTCCTTAG |
| SM-tgt_deletion-5  | ATGAAATTTGAGTTAGATACCACCGATGGTCGCGCGC<br>GTCGTGTAGGCTGGAGCTGCTTC     |
| SM-tgt_deletion-3  | TTAATCAACGTTCAAAGGTGGAACGGGTCGCCCCCTGA<br>CGTGTCCATATGAATATCCTCCTTAG |

**Table S5.** Distributions *tgt* and preQ<sub>0</sub>/preQ<sub>1</sub> synthesis genes in phage genomes

| NCBI accession | Name       | Host                                | <i>folE</i> | <i>queD</i> | <i>queE</i> | <i>queC</i> | <i>gat-queC</i> | <i>queF</i> | <i>tgt</i> | <i>parB</i> |
|----------------|------------|-------------------------------------|-------------|-------------|-------------|-------------|-----------------|-------------|------------|-------------|
| KC821616.1     | phiSM      | <i>Cellulophaga baltica</i>         | gp57        | gp49        | gp48        | gp50        |                 | gp54        | gp52       | gp51        |
| HQ268735       | Dp-1       | <i>Streptococcus pneumoniae</i>     | gp5         | gp3         | gp4         | gp2         |                 | gp1         | gp7        |             |
| NC_022087.1    | AnnaL29    | <i>Mycobacterium smegmatis</i>      | gp6         | gp4         | gp5         | gp3         |                 |             | gp2        | gp1         |
| JN699004.1     | Ares       | <i>Mycobacterium avium</i>          | gp6         | gp4         | gp5         | gp3         |                 |             | gp2        | gp1         |
| JN698991       | Hedgerow   | <i>Mycobacterium avium</i>          | gp6         | gp4         | gp5         | gp3         |                 |             | gp2        | gp1         |
| KM101117.1     | LizLemon   | <i>Mycobacterium avium</i>          | gp6         | gp4         | gp5         | gp3         |                 |             | gp2        | gp1         |
| DQ398048       | Qyrzula    | <i>Mycobacterium avium</i>          | gp6         | gp4         | gp5         | gp3         |                 |             | gp2        | gp1         |
| AY129334       | rosebush   | <i>Mycobacterium avium</i>          | gp6         | gp4         | gp5         | gp3         |                 |             | gp2        | gp1         |
| NC_019515.1    | BCD7       | <i>Bacillus cereus</i>              | gp20        | gp14        | gp15        | gp17        |                 |             | gp21       |             |
| NC_009447.1    | BcepGomr   | <i>Burkholderia</i>                 | gp33        | gp34        | gp37        | gp35        |                 |             | gp31       |             |
| JX483876.1     | RHEph04    | <i>Rhizobium etli</i>               | gp53        | gp54        | gp56        | gp55        |                 |             | gp50       |             |
| KM236243       | Seurat     | <i>Escherichia coli</i> ETEC        | gp35        | gp36        | gp43        | gp39        |                 |             | gp33       |             |
| NC_026610.1    | VpKK5      | <i>Vibrio parahaemolyticus</i>      | gp69        | gp68        | gp66        | gp67        |                 |             | gp70       |             |
| NC_024146.1    | 9g         | <i>Escherichia coli</i> K-12        | gp4         | gp5         | gp8         |             | gp6             |             | gp3        |             |
| KP719134.1     | JenK1      | <i>Escherichia coli</i> K-12        | gp32        | gp33        | gp36        |             | gp34            |             | gp31       |             |
| KP719132.1     | JenP1      | <i>Escherichia coli</i> K-12        | gp34        | gp35        | gp38        |             | gp36            |             | gp32       |             |
| JQ807243.1     | eHP-23     | unknown                             |             |             |             |             |                 |             | gp13<br>0  |             |
| NC_019768.1    | HK106      | <i>Escherichia coli</i>             |             |             |             |             |                 |             | gp29       |             |
| NC_023724.1    | Larva      | <i>Mycobacterium smegmatis</i>      |             |             |             |             |                 |             | gp86       |             |
| JX042579.1     | macncheese | <i>Mycobacterium smegmatis</i>      |             |             |             |             |                 |             | gp42       |             |
| NC_026598.1    | Milly      | <i>Mycobacterium smegmatis</i>      |             |             |             |             |                 |             | gp42       |             |
| NC_008197.1    | Orion      | <i>Mycobacterium smegmatis</i>      |             |             |             |             |                 |             | gp20       |             |
| NC_021558.1    | PG1        | <i>Paenibacillus glucanolyticus</i> |             |             |             |             |                 |             | gp49       |             |
| NC_015938.1    | phage 7-11 | <i>Salmonella</i> Newport           |             |             |             |             |                 |             | gp32       |             |
| KJ743987.1     | phiLM21    | <i>Sinorhizobium</i> sp. LM21       |             |             |             |             |                 |             | gp25       |             |
| NC_021303.1    | SDcharge11 | <i>Mycobacterium smegmatis</i>      |             |             |             |             |                 |             | gp20       |             |
| JX509734.1     | Sfi        | <i>Shigella flexneri</i>            |             |             |             |             |                 |             | gp34       |             |

| <b>NCBI<br/>accession</b> | <b>Name</b>               | <b>Host</b>                      | <i>folE</i> | <i>queD</i> | <i>queE</i> | <i>queC</i> | <i>gat-<br/>queC</i> | <i>queF</i> | <i>tgt</i> | <i>parB</i> |
|---------------------------|---------------------------|----------------------------------|-------------|-------------|-------------|-------------|----------------------|-------------|------------|-------------|
| NC_004087.1               | SIRV1                     | <i>Sulfolobus islandicus</i>     |             |             |             |             |                      |             | gp6        |             |
| NC_004086.1               | SIRV2                     | <i>Sulfolobus islandicus</i>     |             |             |             |             |                      |             | gp13       |             |
| NC_019545.1               | SPN3UB                    | <i>Salmonella Typhimurium</i>    |             |             |             |             |                      |             | gp54       |             |
| NC_025375.1               | SRV                       | <i>Stygiolobus species</i>       |             |             |             |             |                      |             | gp14       |             |
| NC_006268.1               | STSV1                     | <i>Sulfolobus tengchongensis</i> |             |             |             |             |                      |             | gp18       |             |
| NC_020077.1               | STSV2                     | <i>Sulfolobus tengchongensis</i> |             |             |             |             |                      |             | gp15       |             |
| NC_023563.1               | Suffolk                   | <i>Mycobacterium smegmatis</i>   |             |             |             |             |                      |             | gp20       |             |
| KJ194579.1                | Swish                     | <i>Mycobacterium smegmatis</i>   |             |             |             |             |                      |             | gp20       |             |
| NC_023498.1               | Validus                   | <i>Mycobacterium smegmatis</i>   |             |             |             |             |                      |             | gp43       |             |
| AJ748296.1                | rudivirus 1<br>variant XX | <i>Sulfolobus islandicus</i>     |             |             |             |             |                      |             | gp6        |             |
| NC_024147.1               | ZoeJ                      | <i>Mycobacterium smegmatis</i>   |             |             |             |             |                      |             | gp42       |             |
| KC821625.1                | phi13:1                   | <i>Cellulophaga baltica</i>      | gp32        | gp30        | gp31        |             |                      |             |            |             |

## References

1. Overbeek R, *et al.* (2005) The subsystems approach to genome annotation and its use in the project to annotate 1000 genomes. *Nucleic Acids Res Symp Series* 33(17):5691-5702.
2. Overbeek R, *et al.* (2014) The SEED and the Rapid Annotation of microbial genomes using Subsystems Technology (RAST). (Translated from eng) *Nucleic Acids Res* 42(Database issue):D206-214 (in eng).
3. Letunic I & Bork P (2011) Interactive Tree Of Life v2: online annotation and display of phylogenetic trees made easy. (Translated from eng) *Nucleic Acids Res* 39(Web Server issue):W475-478 (in eng).
4. Altschul SF, Gish W, Miller W, Myers EW, & Lipman DJ (1990) Basic local alignment search tool. *J Mol Microbiol* 215(3):403-410.
5. Edgar RC (2004) MUSCLE: multiple sequence alignment with high accuracy and high throughput. *Nucleic Acids Res* 32(5):1792-1797.
6. Corpet F (1988) Multiple sequence alignment with hierarchical clustering. *Nucleic Acids Res* 16(22):10881-10890.
7. Crooks GE, Hon G, Chandonia J-M, & Brenner SE (2004) WebLogo: a sequence logo generator. *Genome Res* 14(6):1188-1190.
8. Finn RD, *et al.* (2010) The Pfam protein families database. *Nucleic Acids Res* 38(suppl\_1):D211-222.
9. Marchler-Bauer A, *et al.* (2011) CDD: a Conserved Domain Database for the functional annotation of proteins. *Nucleic Acids Res* 39(suppl 1):D225-D229.
10. Soding J, Biegert A, & Lupas AN (2005) The HHpred interactive server for protein homology detection and structure prediction. *Nucleic Acids Res* 33(Web Server issue):W244-248.
11. Kelley LA, Mezulis S, Yates CM, Wass MN, & Sternberg MJ (2015) The Phyre2 web portal for protein modeling, prediction and analysis. *Nat Protoc* 10(6):845-858.
12. Katoh K & Standley DM (2013) MAFFT multiple sequence alignment software version 7: improvements in performance and usability. *Mol Biol Evol* 30(4):772-780.
13. Criscuolo A & Gribaldo S (2010) BMGE (Block Mapping and Gathering with Entropy): a new software for selection of phylogenetic informative regions from multiple sequence alignments. *BMC Evol Biol* 10:210.
14. Guindon S, *et al.* (2010) New algorithms and methods to estimate maximum-likelihood phylogenies: assessing the performance of PhyML 3.0. *Syst Biol* 59(3):307-321.
15. Le SQ & Gascuel O (2008) An improved general amino acid replacement matrix. *Mol Biol Evol* 25(7):1307-1320.
16. Ronquist F, *et al.* (2012) MrBayes 3.2: efficient Bayesian phylogenetic inference and model choice across a large model space. *Syst Biol* 61(3):539-542.
17. Dereeper A, *et al.* (2008) Phylogeny.fr: robust phylogenetic analysis for the non-specialist. *Nucleic Acids Res* 36(Web Server issue):W465-469.
18. Kulikov EE, *et al.* (2014) Genomic sequencing and biological characteristics of a novel *Escherichia coli* bacteriophage 9g, a putative representative of a new Siphoviridae genus. *Viruses* 6(12):5077-5092.
19. Datsenko KA & Wanner BL (2000) One-step inactivation of chromosomal genes in *Escherichia coli* K-12 using PCR products. *Proc Natl Acad Sci U S A* 97(12):6640-6645.

20. Kasarjian JK, Iida M, & Ryu J (2003) New restriction enzymes discovered from *Escherichia coli* clinical strains using a plasmid transformation method. *Nucleic Acids Res* 31(5):e22.
21. Xu T, Yao F, Zhou X, Deng Z, & You D (2010) A novel host-specific restriction system associated with DNA backbone S-modification in *Salmonella*. *Nucleic Acids Res* 38(20):7133-7141.
22. Ramzaeva N, Becher G, & Seela F (1998) Facile synthesis of 2'-deoxynucleoside analogs of preQ. *Synthesis* 1998(09):1327-1330.
23. Bruckl T, Klepper F, Gutmiedl K, & Carell T (2007) A short and efficient synthesis of the tRNA nucleosides PreQ<sub>0</sub> and archaeosine. *Org Biomol Chem* 5(23):3821-3825.
24. Wang RW & Gold B (2009) A facile synthetic approach to 7-deazaguanine nucleosides via a Boc protection strategy. *Org Lett* 11(11):2465-2468.
25. Levic J & Micura R (2014) Syntheses of (15)N-labeled pre-queuosine nucleobase derivatives. *Beilstein J Org Chem* 10:1914-1918.
26. Igloi GL & Kossel H (1985) Affinity electrophoresis for monitoring terminal phosphorylation and the presence of queuosine in RNA. Application of polyacrylamide containing a covalently bound boronic acid. (Translated from eng) *Nucleic Acids Res* 13(19):6881-6898 (in eng).
27. Zaborske JM, *et al.* (2014) A nutrient-driven tRNA modification alters translational fidelity and genome-wide protein coding across an animal genus. *PLoS Biol* 12(12):e1002015.
28. Phillips G, *et al.* (2008) Biosynthesis of 7-deazaguanosine-modified tRNA nucleosides: a new role for GTP cyclohydrolase I. *J Bacteriol* 190(24):7876-7884.
29. Crain PF (1990) Preparation and enzymatic hydrolysis of DNA and RNA for mass spectrometry. *Methods Enzymol* 193:782-790.
30. Pomerantz SC & McCloskey JA (1990) Analysis of RNA hydrolyzates by liquid chromatography-mass spectrometry. *Methods Enzymol* 193:796-824.
31. Zhuang RY, Beuchat LR, & Angulo FJ (1995) Fate of *Salmonella montevideo* on and in raw tomatoes as affected by temperature and treatment with chlorine. *Appl Environ Microbiol* 61(6):2127-2131.
32. Phillips RW, *et al.* (2002) *Kineococcus radiotolerans* sp. nov., a radiation-resistant, gram-positive bacterium. (Translated from eng) *Int J Syst Evol Microbiol* 52(Pt 3):933-938 (in eng).
33. Tamaoka J, Ha D-M, & Komagata K (1987) Reclassification of *Pseudomonas acidovorans* den Dooren de Jong 1926 and *Pseudomonas testosteroni* Marcus and Talalay 1956 as *Comamonas acidovorans* comb. nov. and *Comamonas testosteroni* comb. nov., with an emended description of the genus *Comamonas*. *Int J Syst Evol Microbiol* 37(1):52-59.
34. Rosselló-Mora R, Ludwig W, Kämpfer P, Amann R, & Schleifer KH (1995) *Ferrimonas balearica* gen. nov., sp. nov., a new marine facultative Fe(III)-reducing bacterium. *Syst Appl Microbiol* 18(2):196-202.
35. Tenreiro S, Nobre MF, & da Costa MS (1995) *Thermus silvanus* sp. nov. and *Thermus chliarophilus* sp. nov., two new species related to *Thermus ruber* but with lower growth temperatures. *Int J Syst Bacteriol* 45(4):633-639.
36. Vancanneyt M, *et al.* (2001) *Sphingomonas alaskensis* sp. nov., a dominant bacterium from a marine oligotrophic environment. *Int J Syst Evol Microbiol* 51(Pt 1):73-79.



37. Appleyard RK (1954) Segregation of new lysogenic types during growth of a doubly lysogenic strain derived from *Escherichia coli* K12. *Genetics* 39(4):440-452.

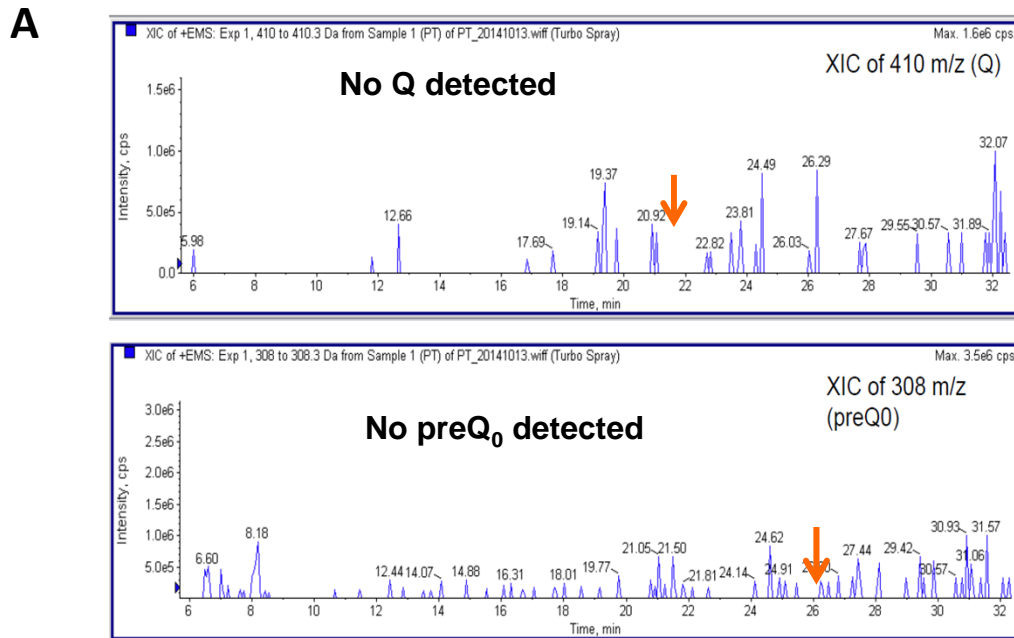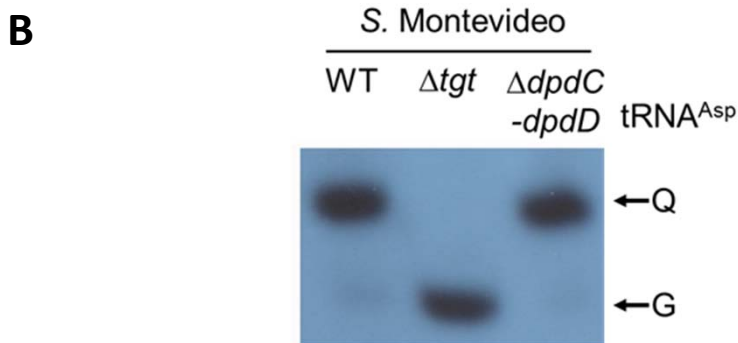

**Figure S1.** TgtA5 does not insert Q or PreQ<sub>0</sub> in tRNA. (A) LC-MS/MS analysis of bulk tRNA from *K. radiotolerans* shows the absence of queuosine (top) and lack of preQ<sub>0</sub> (bottom). Arrows indicate absence of peak. (B) Detection of queuosine (Q) on tRNA<sup>Asp</sup> of *S. Montevideo* wild-type (WT), YYF3020 ( $\Delta tgt$ ) and YYF3022 ( $\Delta dpdC$ - $dpdD$ ). Bulk tRNA was resolved on an 8 M urea, 8% polyacrylamide gel containing 0.5% 3-(acrylamido)phenylboronic acid and transferred to a nylon membrane. The blotted tRNA was probed with a biotinylated primer to tRNA<sup>Asp</sup>, and detected with the North2South Chemiluminescent Hybridization and Detection Kit. tRNA modified with Q migrates slower than unmodified tRNA.

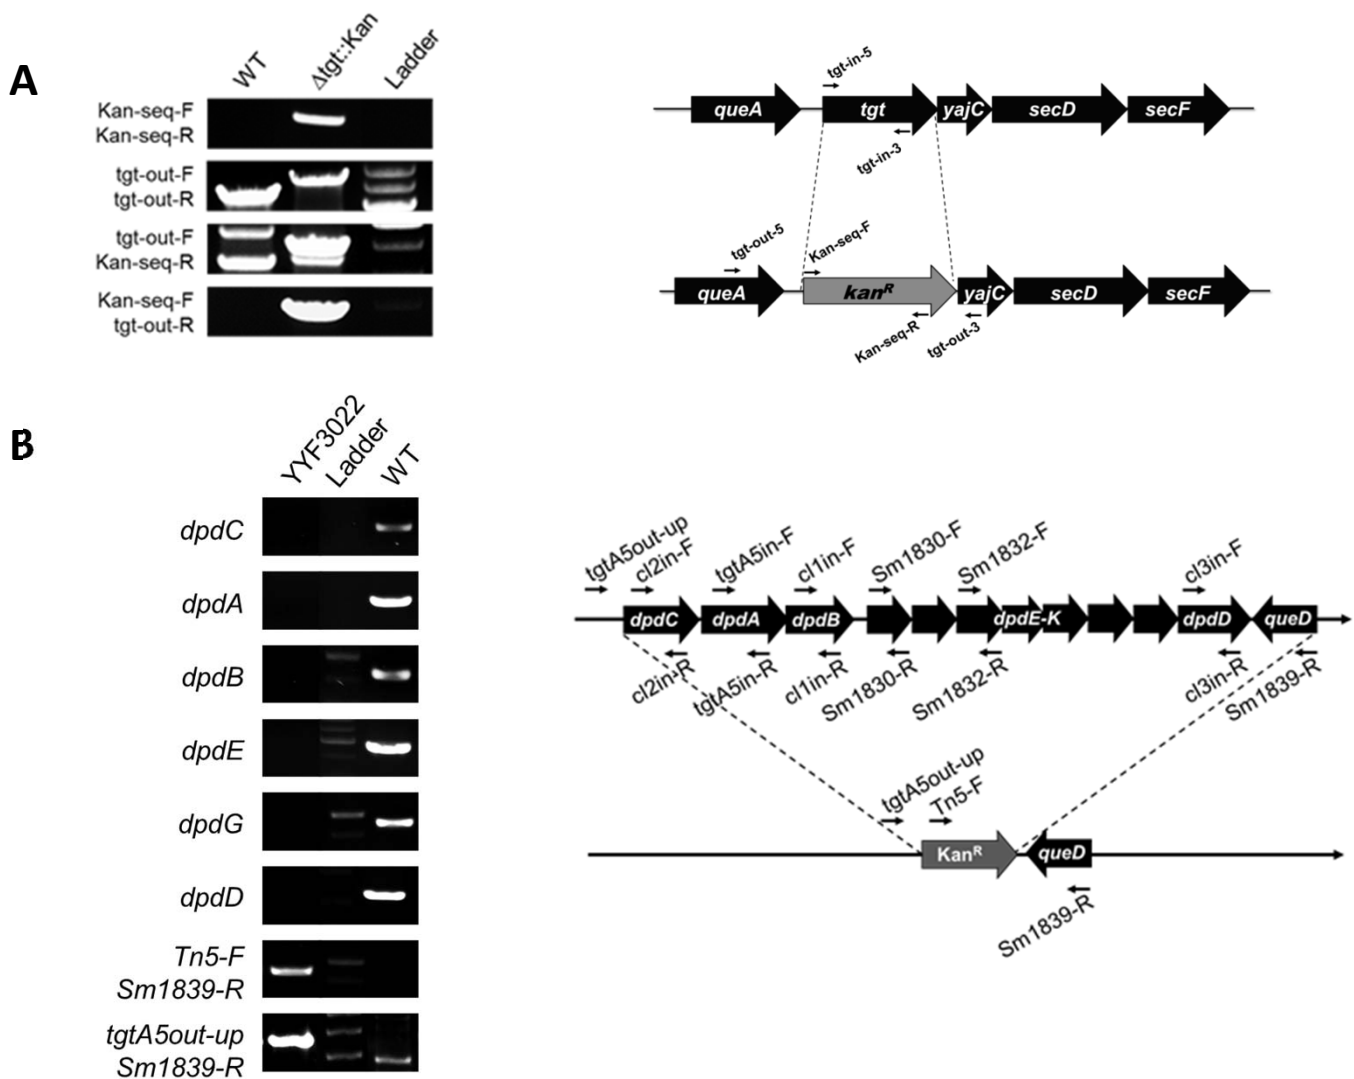

**Figure S2.** Confirmation of mutant strains of *S. Montevideo*. (A) (Right) PCR confirmation of YYF3020 (*S. Montevideo*  $\Delta$ *tgt::kan*). Top row: Kan-seq-F and Kan-seq-R primers confirm the presence of kanamycin cassette in the mutant, but absence in the wild-type (WT). Second row: *tgt*-out-F and *tgt*-out-R primers give a larger PCR product for mutant than WT. Third row: kan-seq-F and *tgt*-out-R primers show insertion of kanamycin cassette at the correct location. (Left) *tgt* gene cluster of *S. Montevideo* and construct of  $\Delta$ *tgt::kan*. Small arrows above or below indicate primers used for PCR confirmation (Right).

(B) PCR confirmation of YYF3022 (*S. Montevideo*  $\Delta$ *dpdC-dpdD::kan*) (Left). Absence of *dpdC* was confirmed with *cl2in-F* and *cl2in-R* primers, Absence of *dpdA* was confirmed with *tgtA5in-F* and *tgtA5in-R* primers. Absence of *dpdB* was confirmed with *cl1in-F* and *cl1in-R* primers. Absence of *dpdE* was confirmed with SM1830-F and SM1830-R primers. Absence of *dpdG* was confirmed with SM1832-R and SM1832-R primers. Replacement the 11 genes of the *dpd* cluster with kanamycin resistance cassette was confirmed using Tn5-F and SM1839-R primers and *tgtA5-out-up* and SM1839-R primers. (Right) Positions of the primers.

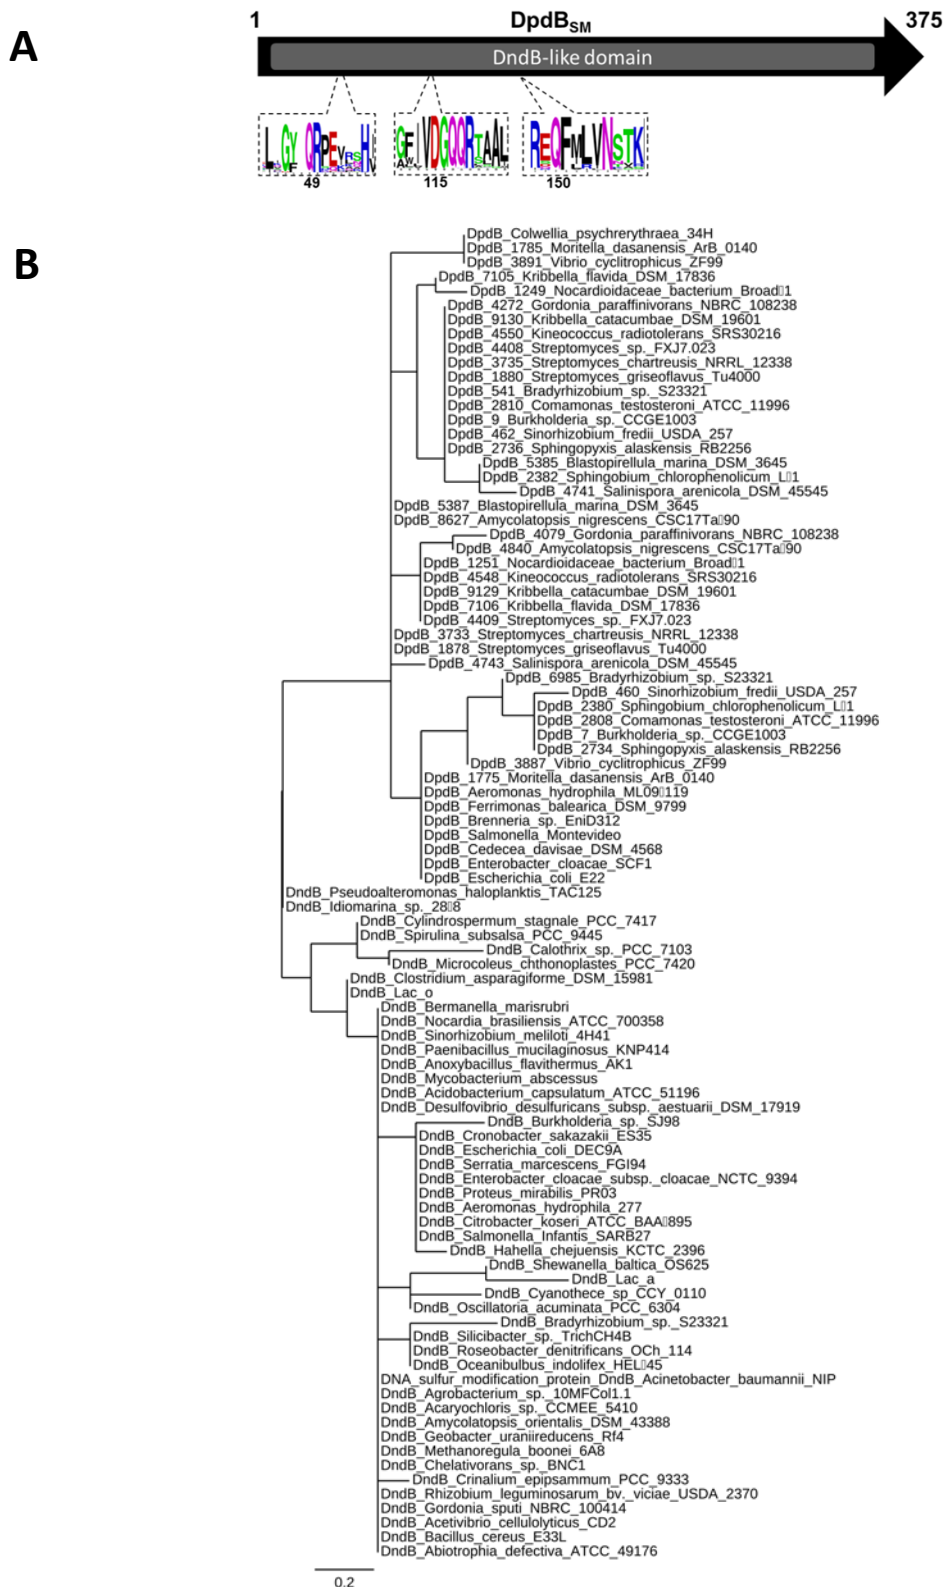

**Figure S3.** DndB-like proteins cluster with *tgtA5*. (A) Conserved sequence motifs of DndB are conserved in DpdB. Shown here is a schematic of *S. Montevideo* DpdB (Uniprot ID: A0A023N865). Grey bar depicts “DndB-like” domain identified by PFAM. Sequence logo beneath represents alignment of all DpdB sequences retrieved from the PubSEED database. Conserved residues shown are also highly conserved in the DndB proteins (QR, FXXXN, and DGQQ/HR). Numbers beneath the logo correspond to the *S. Montevideo* DpdB sequence. (B) Phylogenetic tree of representative DpdB and DndB proteins constructed using phylogeny.fr.

***Meiothermus chliarophilus* DSM9957**

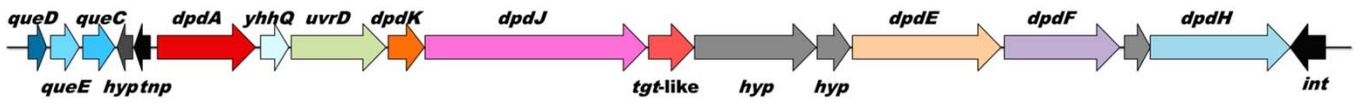

***Sphingopyxis alaskensis* RB2256**

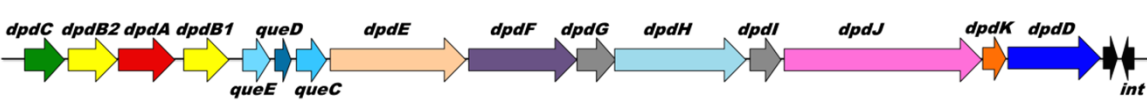

***Ferrimonas balearica* DSM 9799**

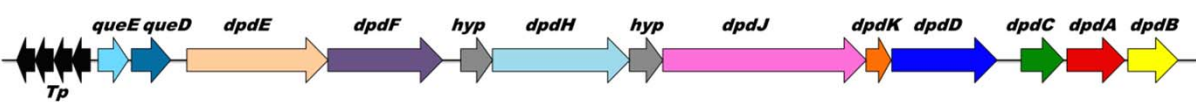

***Comamonas testosteroni* ATCC 11996**

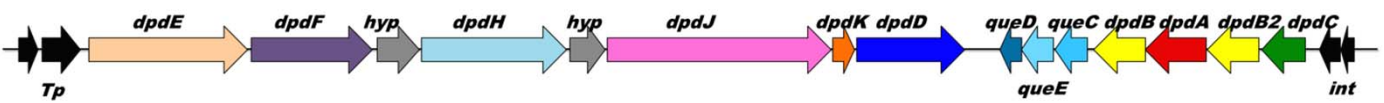

**Figure S4.** Gene cluster patterns for *tgtA5/dpdA* of diverse bacteria confirmed to have ADG on DNA. *Meiothermus chliarophilus* (GenBank Accession: NZ\_KE387023; TgtA5 UniParc ID: UPI0004218CCF), *Sphingopyxis alaskensis* RB2256 (GenBank Accession: NC\_008048.1; TgtA5 UniProt ID Q1GPS0), *Ferrimonas balearica* DSM9799 (GenBank accession: NC\_014541.1; TgtA5 UniProt ID E1SVY3), *Comamonas testosteroni* ATCC 11996 (GenBank Accession: NZ\_AHIL000000000.1; TgtA5 UniProt ID H1RRG1). All gene data was acquired from the SEED database. Labeling and colors follow Figure 1B. Red arrows represent *tgtA5/dpdA* genes, black arrows represent genes indicative of mobile elements, grey arrows represent genes of unknown function.

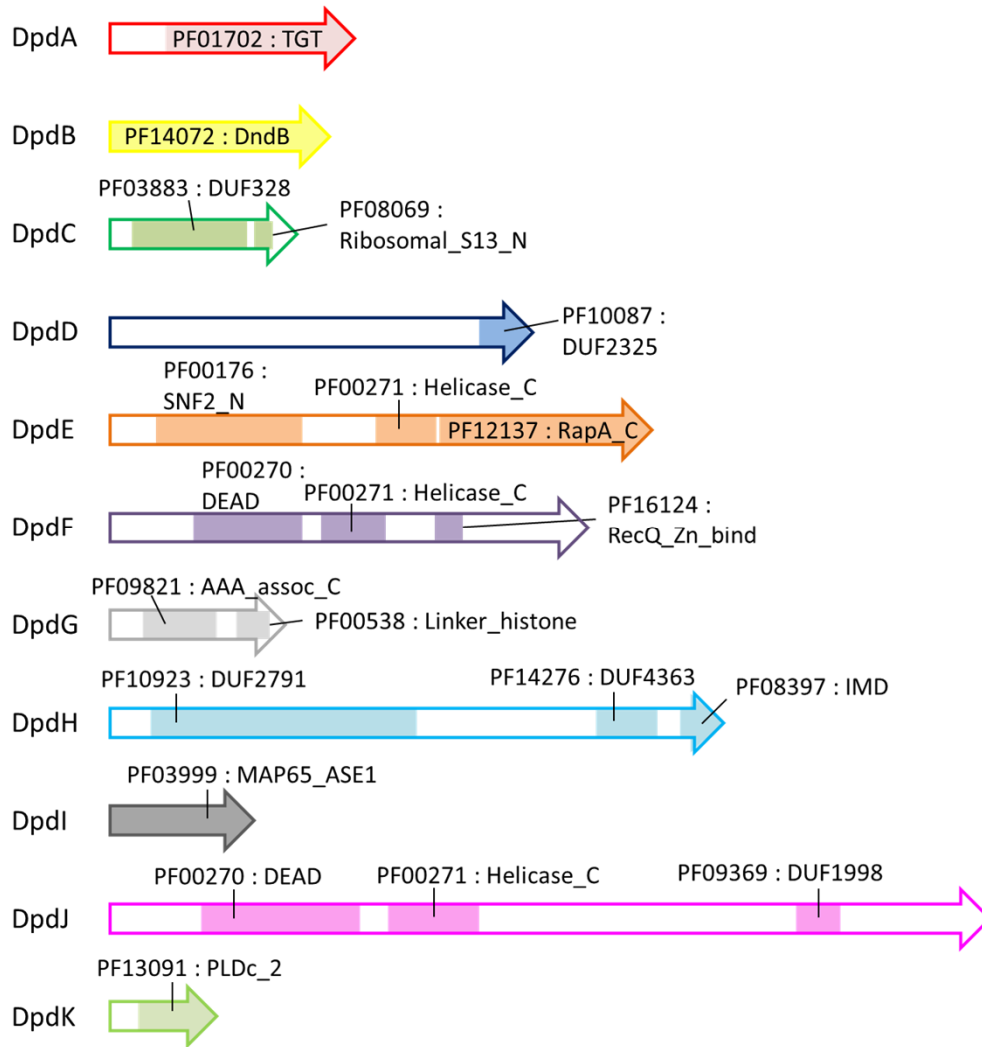

**Figure S5.** Domain predictions of proteins encoded in *S. Montevideo* *tgtA5/dpdA* gene cluster. Domains were predicted using HHpred running a query against the PFAM database.

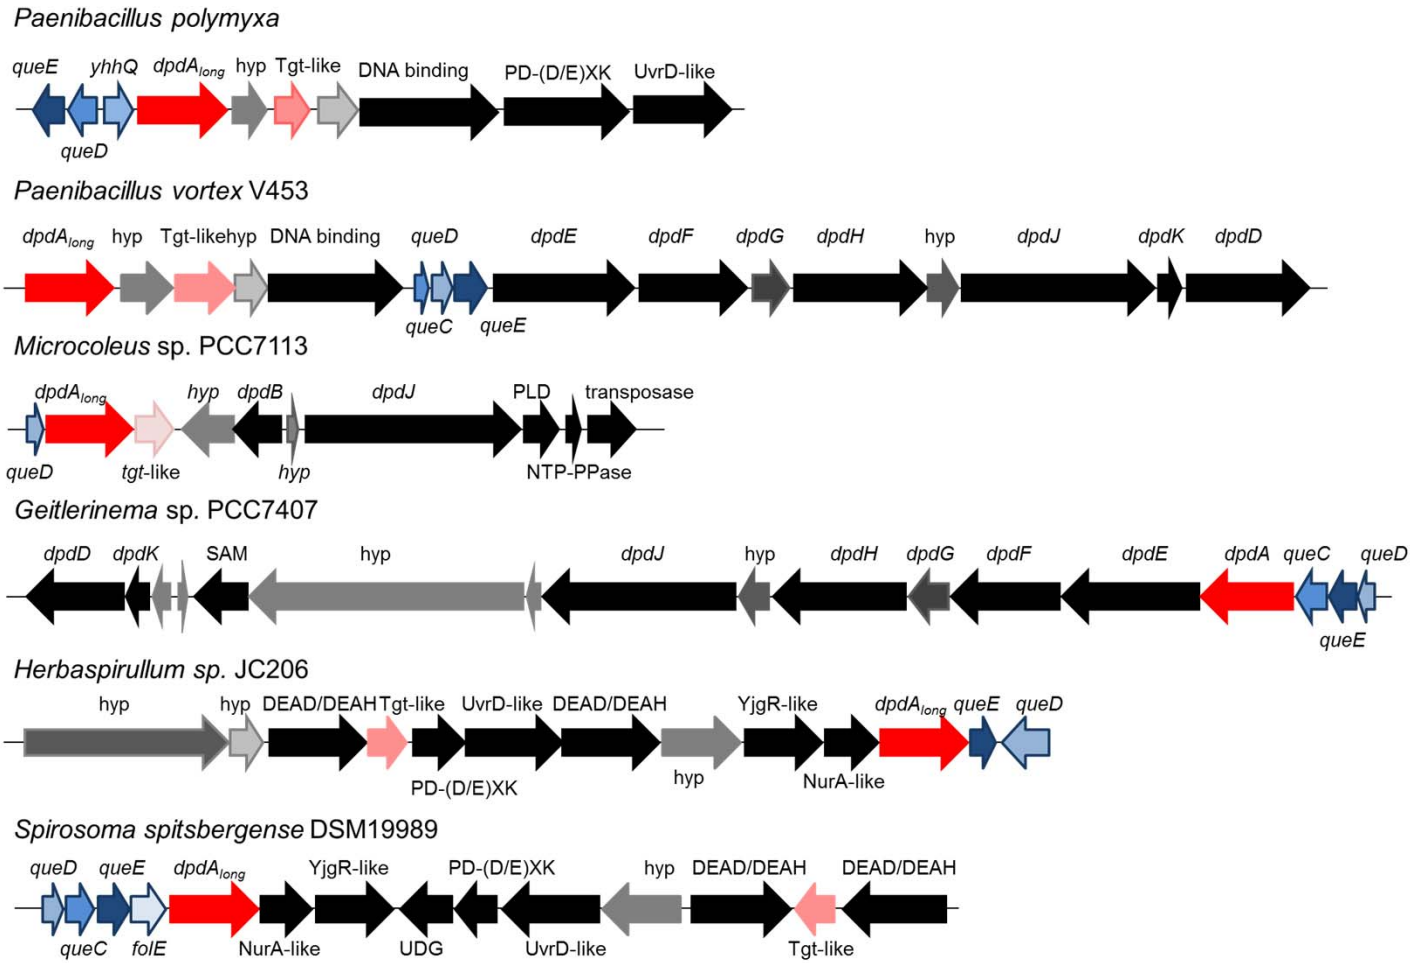

**Figure S6.** Gene cluster patterns for the long versions of *tgtA5/dpdA*. *Paenibacillus polymyxa* (DpdA UniProt ID: G0VWT7); *Paenibacillus vortex* V453 (DpdA UniProt ID: UPI0001F05DD6); *Microcoleus* sp. PCC7113 (DpdA UniProt ID: K9WRC9); *Geitlerinema* sp. PCC7407 (DpdA UniProt ID: K9SAS3); *Herbaspirillum* sp. JC206 (DpdA UniProt ID: UPI000315EA36), and *Spirosoma spitsbergense* DSM19989 (DpdA UniProt ID: UPI00037258A1).

All gene data was acquired from the SEED database. Red arrows represent *tgtA5/dpdA* genes, blue arrows represent preQ<sub>0</sub> synthesis (*queE*, *queC*, *queD*) and transporter genes (*yhhQ*), grey arrows represent genes of unknown function (*hyp*), black arrows represent genes with predicted domains or functions. SAM: radical SAM superfamily domain; NTP-PPase: nucleotide triphosphate pyrophosphohydrolase; DEAD/DEAH: DEAD/DEAH box helicase; UvrD-like: ATP-dependent DNA helicase UvrD / PcrA; PD-(D/E)XK: PD-(D/E)XK nuclease superfamily / ATP-dependent helicase/deoxyribonuclease subunit B; NurA-like: NurA nuclease superfamily; YjgR-like: YjgR-type ATPase; UDG: Uracil-DNA glycosylase enzyme family.

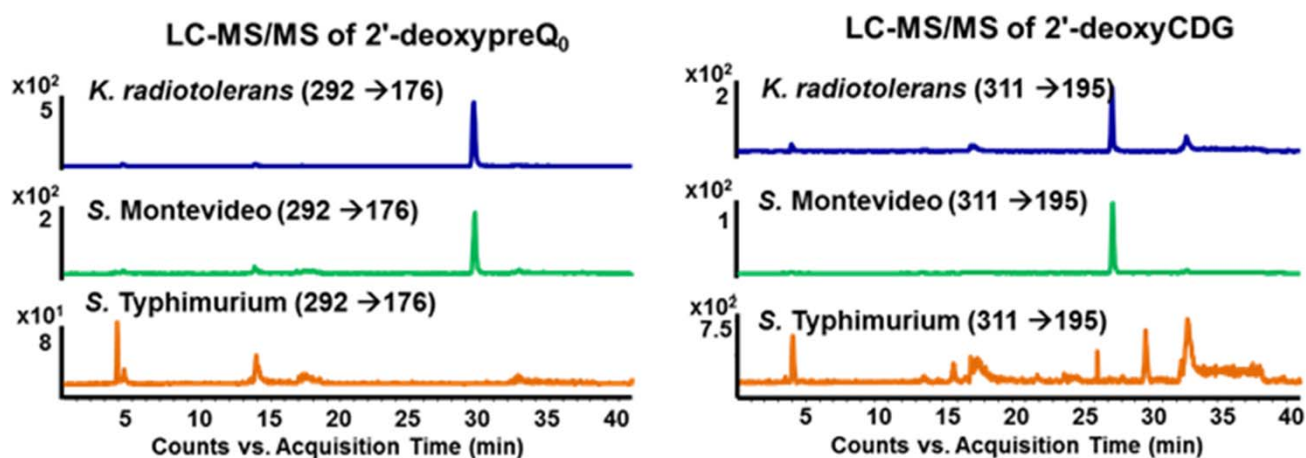

**Figure S7.** Detection of 2'-deoxy-7-deazaguanosine derivatives in *S. Montevideo*, *K. radiotolerans*, but not *S. Typhimurium* LT2. Left panel: MRM chromatogram of putative 2'-deoxypreQ<sub>0</sub> (mass transition: 292→176). Right Panel: MRM chromatogram of predicted 2'-deoxyCDG (mass transition: 311→195) that was later revealed to be the M+1 signal for 2'-deoxyADG (mass transition: 310→194) in DNA of *K. radiotolerans*, *S. Montevideo*, and *S. Typhimurium*. The signals for the two Q-precursors were reproducibly detected in the DNA of *K. radiotolerans* and *S. Montevideo*, but not in *S. Typhimurium*. High mass accuracy mass spectra for these 2-deoxynucleosides are shown in Figure S6.



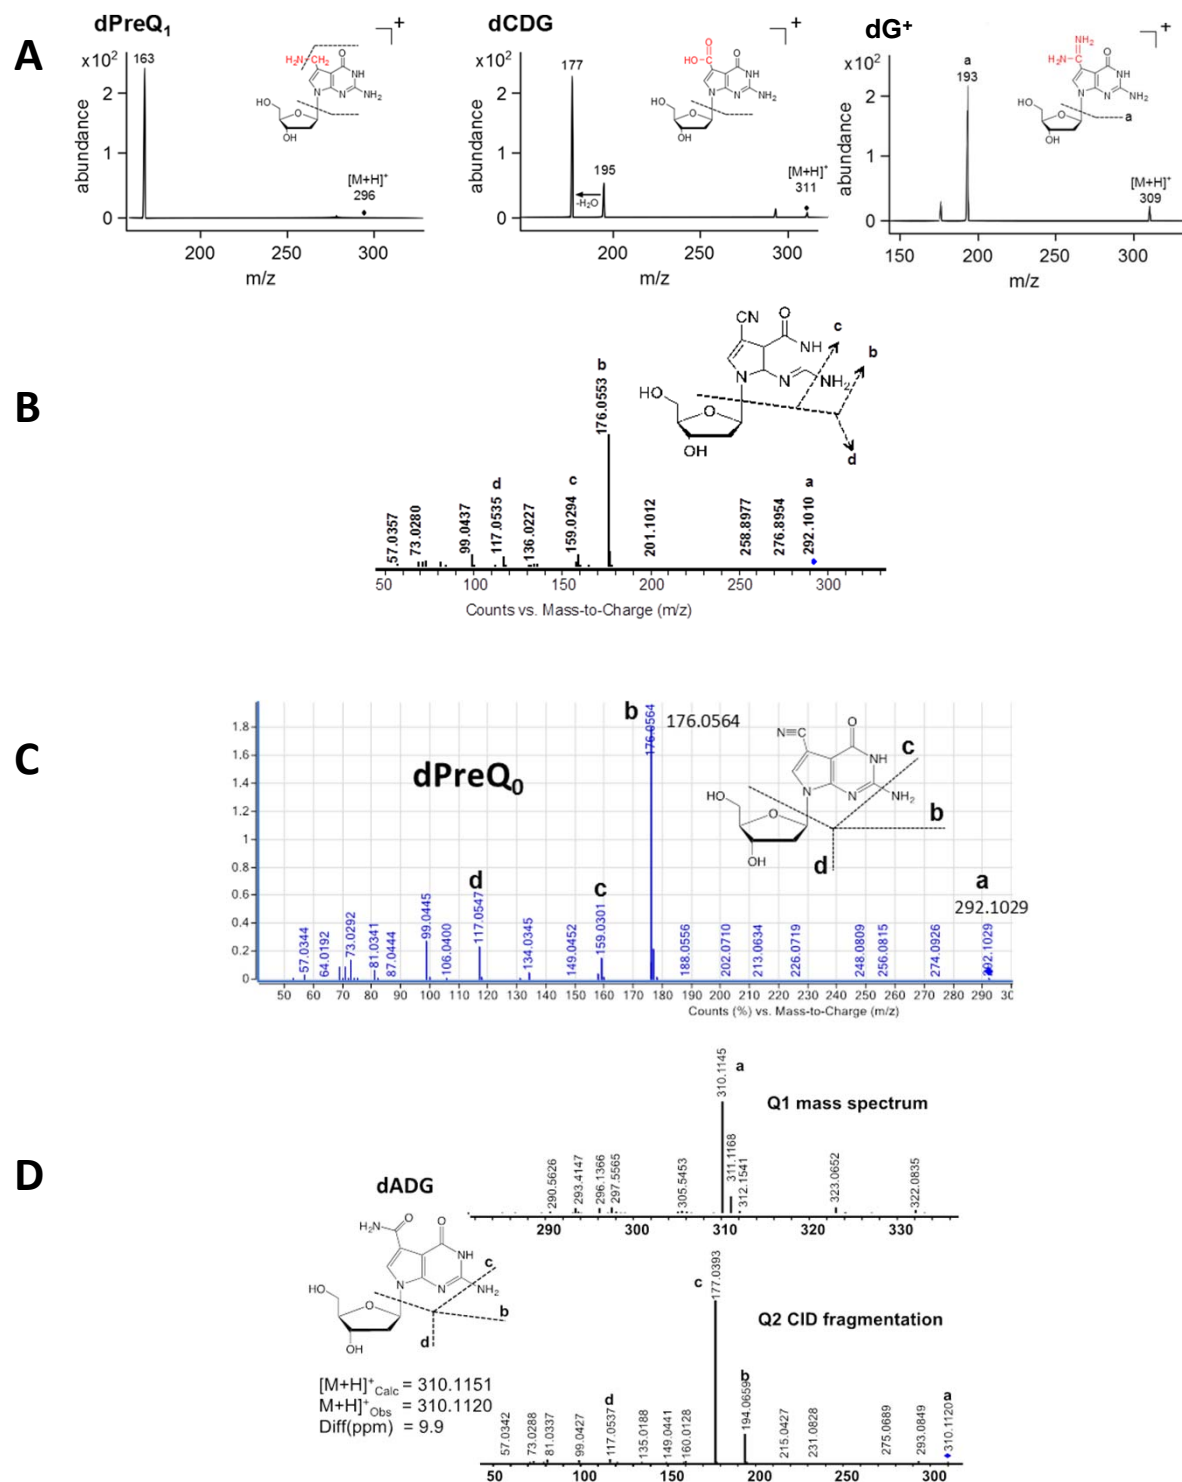

**Figure S8.** Mass spectrometric characterization of Q-like 2'-deoxynucleoside structures. **(A)** Collision-induced dissociation (CID) mass spectra from LC-MS/MS analysis of synthetic dPreQ<sub>1</sub>, dCDG, and dG<sup>+</sup>. The diamonds at 296 and 311 denote the parent molecular ion for dPreQ<sub>1</sub> and dCDG, respectively. CID fragmentation mass transitions used for subsequent LC-MS/MS detection and quantification are indicated with dashed lines. **(B)** High mass-accuracy CID mass spectra from LC-QTOF analysis of dPreQ<sub>0</sub> isolated from bacterial DNA. **(C)** High mass-accuracy CID mass spectra from LC-QTOF analysis of synthetic dPreQ<sub>0</sub> standard. **(D)** High mass-accuracy mass spectra from LC-QTOF analysis of dADG isolated from bacterial DNA. Upper: Q1 mass spectrum of dADG. Lower: Q2 CID fragmentation pattern. The blue diamond at 310.1120 denotes the parent molecular ion for dADG.

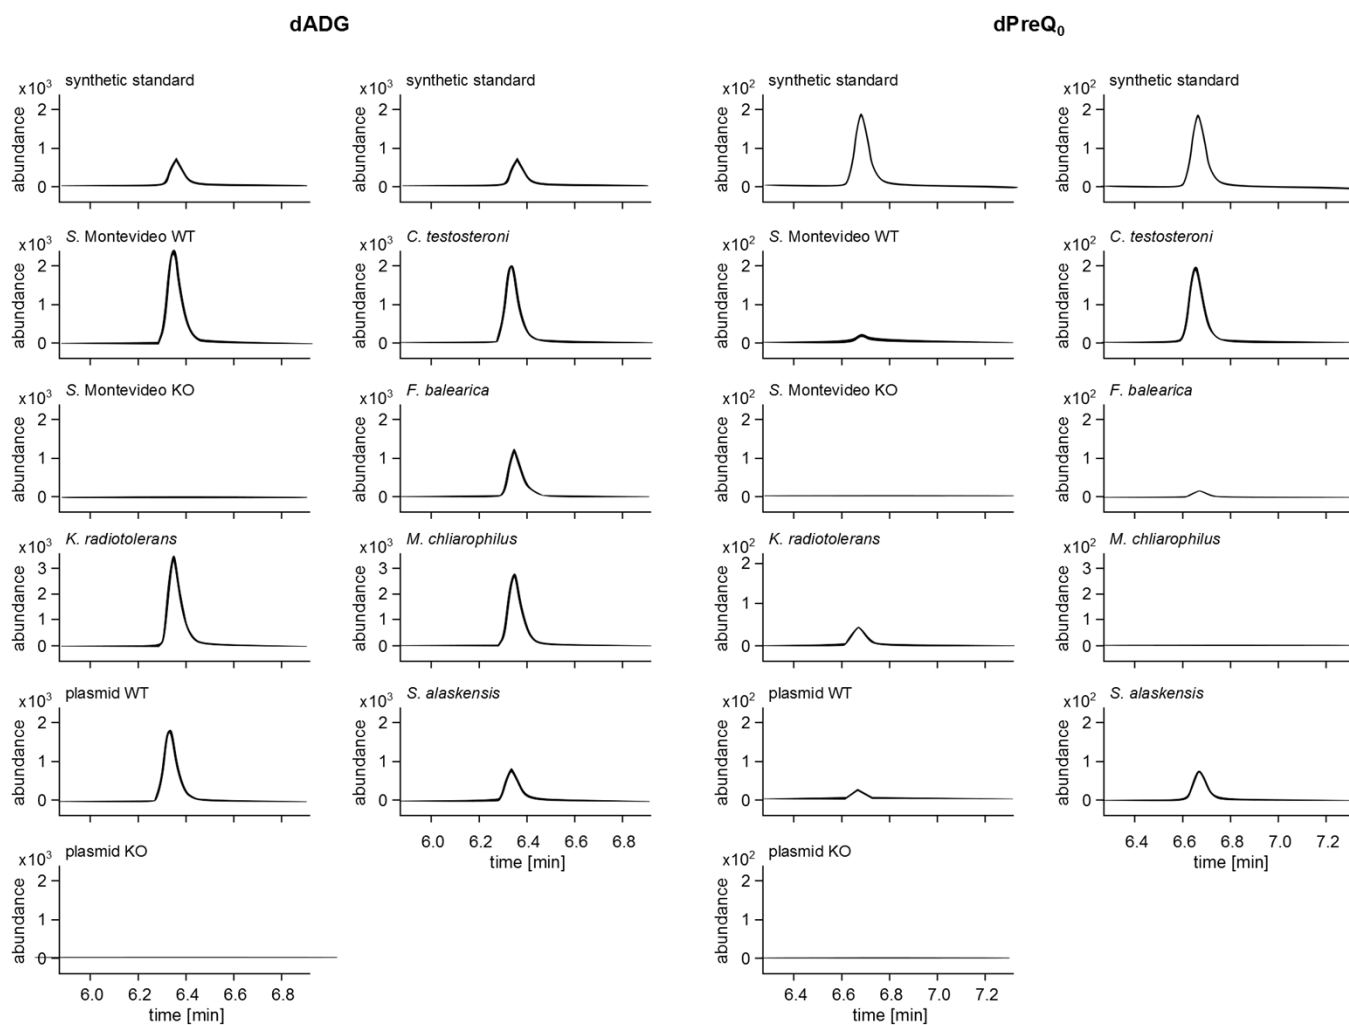

**Figure S9.** Extracted ion chromatograms for dADG and dPreQ<sub>0</sub> detection in various bacterial strains possessing or lacking *dpd* genes. The left two columns show the peaks detected using the mass transition for dADG (310 → 194). The two columns on the right show the peaks detected for the corresponding dPreQ<sub>0</sub> mass transition (292 → 176). In both cases, the upper panels show the peaks from the corresponding synthetic standards as retention time reference.

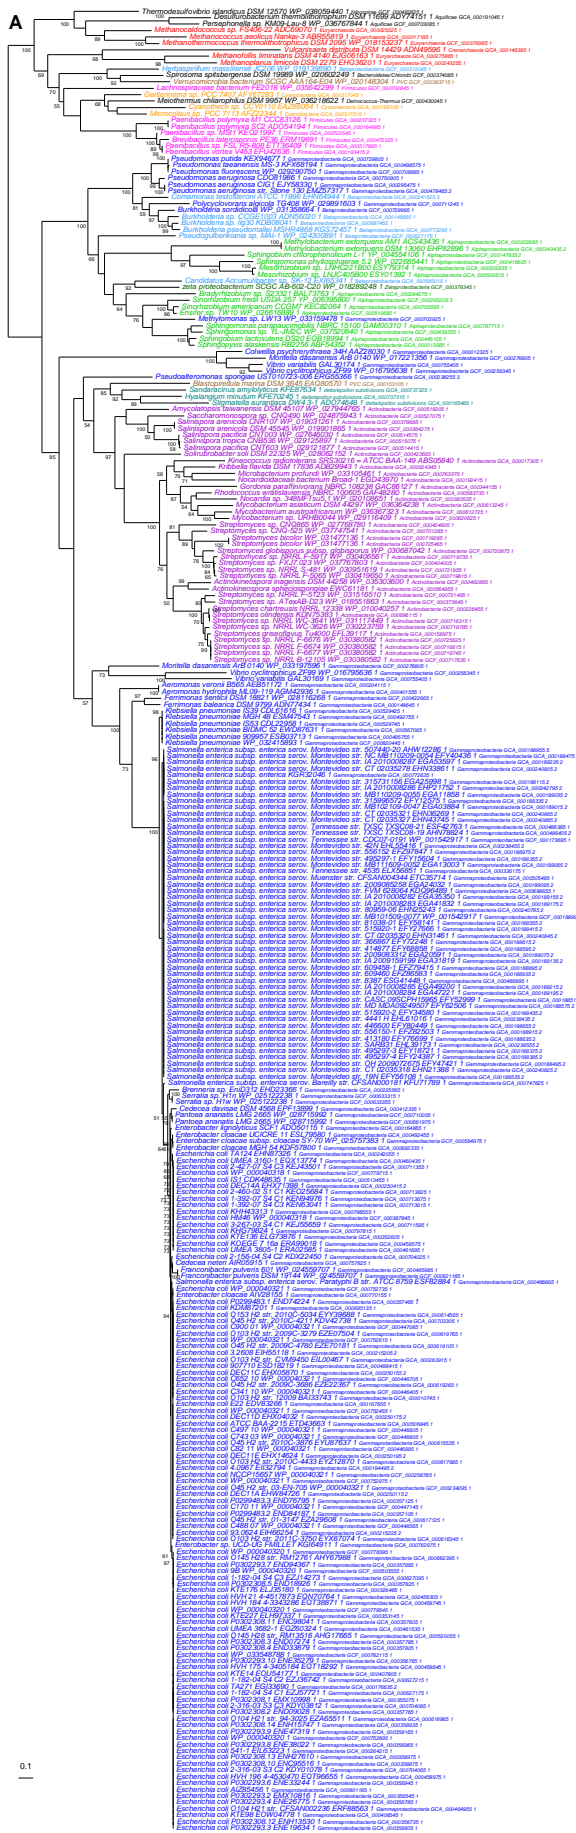

**Figure S10.** Maximum likelihood (A) and Bayesian (B) trees of TgtA5 homologs found in 30,578 proteomes deduced from complete and ongoing genome projects (284 sequences, 362 positions). Numbers at branch represent bootstrap values (maximum likelihood tree, A) or posterior probabilities (Bayesian tree, B). For clarity bootstrap values < 50% and posterior probabilities < 0.5 are not shown. The scale bars represent the average number of substitutions per site. Colors correspond to taxonomic groups (see trees).

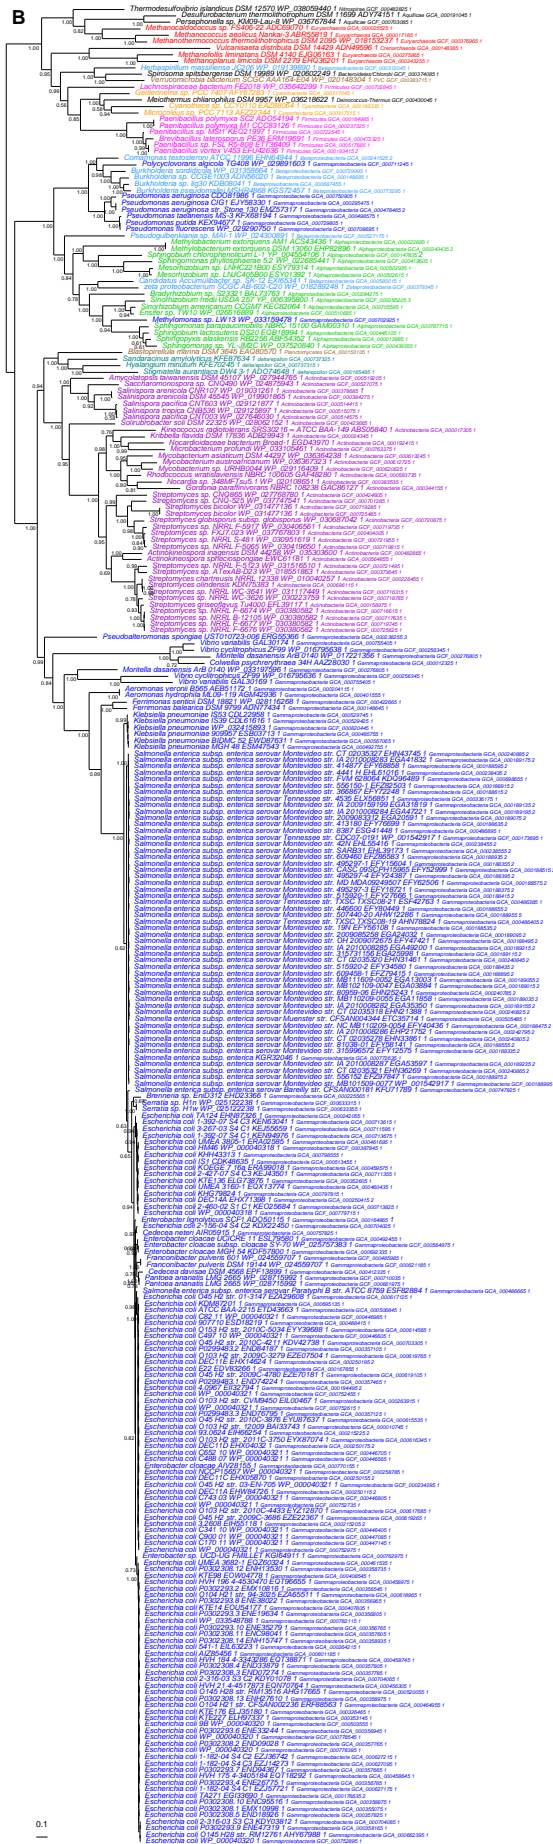

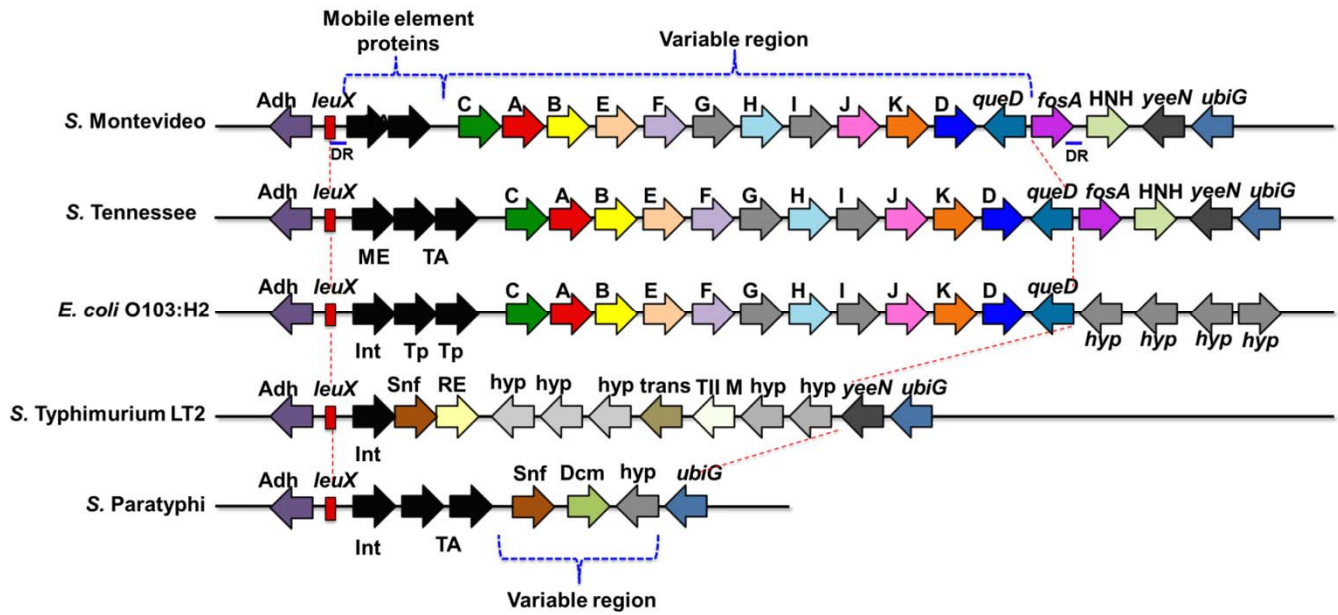

**Figure S11.** Examples of genomic islands inserted at the tRNA-leu gene (*leuX*; red rectangle) hotspot in *Salmonella* and *E. coli*. The red dotted lines delineate the insertions. Black arrows represent mobile element proteins (i.e., integrases, phage-derived genes, transposases, etc). The colors indicate homologs. *S. Montevideo*, *S. Tennessee*, and *E. coli* O103:H2 all have the ADG modification cluster. The gene lettering corresponds to the *dpd* genes in Fig. 1B. *S. Typhimurium* LT2 and *S. Paratyphi* represent variations in genomic islands inserted at this site. DR, 19-bp direct repeats; Adh, alcohol dehydrogenase; ME, mobile element; TA, toxin-antitoxin genes *ccdA-ccdB*; Int, integrase; TII M, Type II restriction methyltransferase; *fosA*, fosfomycin resistance gene; HNH, HNH nuclease; YeeN, putative transcriptional regulator; *ubiG*, 3-methylubiquinone 3-methyltransferase; Dcm, DNA cytosine methyltransferase; Snf, Superfamily I-type helicase.

Uniprot/UniParc entry ID of Adh proteins: *S. Montevideo* (A0A023N8U4); *S. Tennessee* (UPI0001AF5B80); *E. coli* O103:H2 (C8U0M7); *S. Typhimurium* LT2 (Q8ZK20); *S. Paratyphi* B (UPI00000CD606).

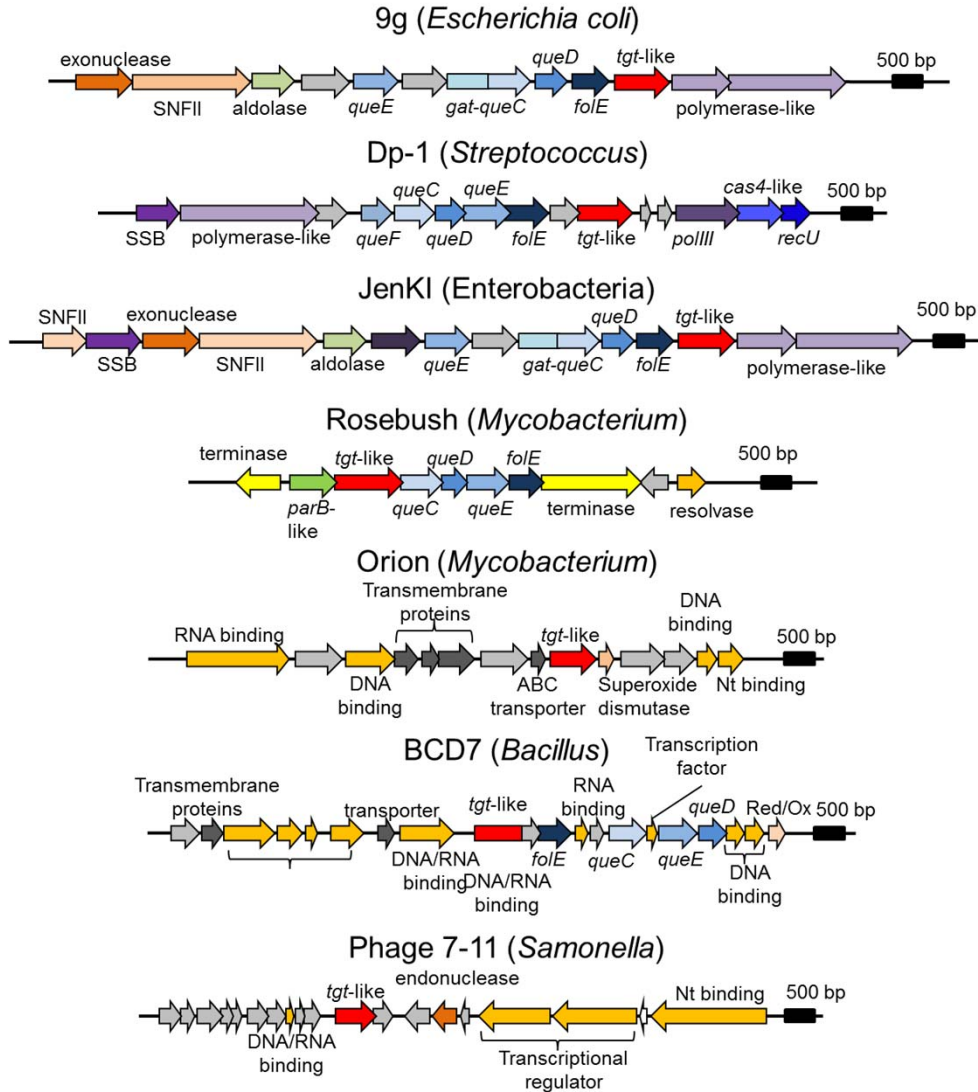

**Figure S12.** Representation of the genomic context of the *tgt*-like genes for 7 representative phages. 9g (NC\_024146), Dp-1 (HQ268735), JenKI (KP719134), Rosebush (AY129334), Orion (NC\_008197), BCD7 (NC\_019515) and Page 7-11 (NC\_015938). Each gene is colored according to predicted function. Red, *tgt*-like, dark blue to light blue, the preQ<sub>0</sub>/preQ<sub>1</sub> biosynthetic pathway; green, *parB*; yellow and orange, predicted to process/bind DNA, RNA, or nucleotides; purple, DNA replication; dark grey, membrane/transporter proteins; light grey, genes of unknown function.



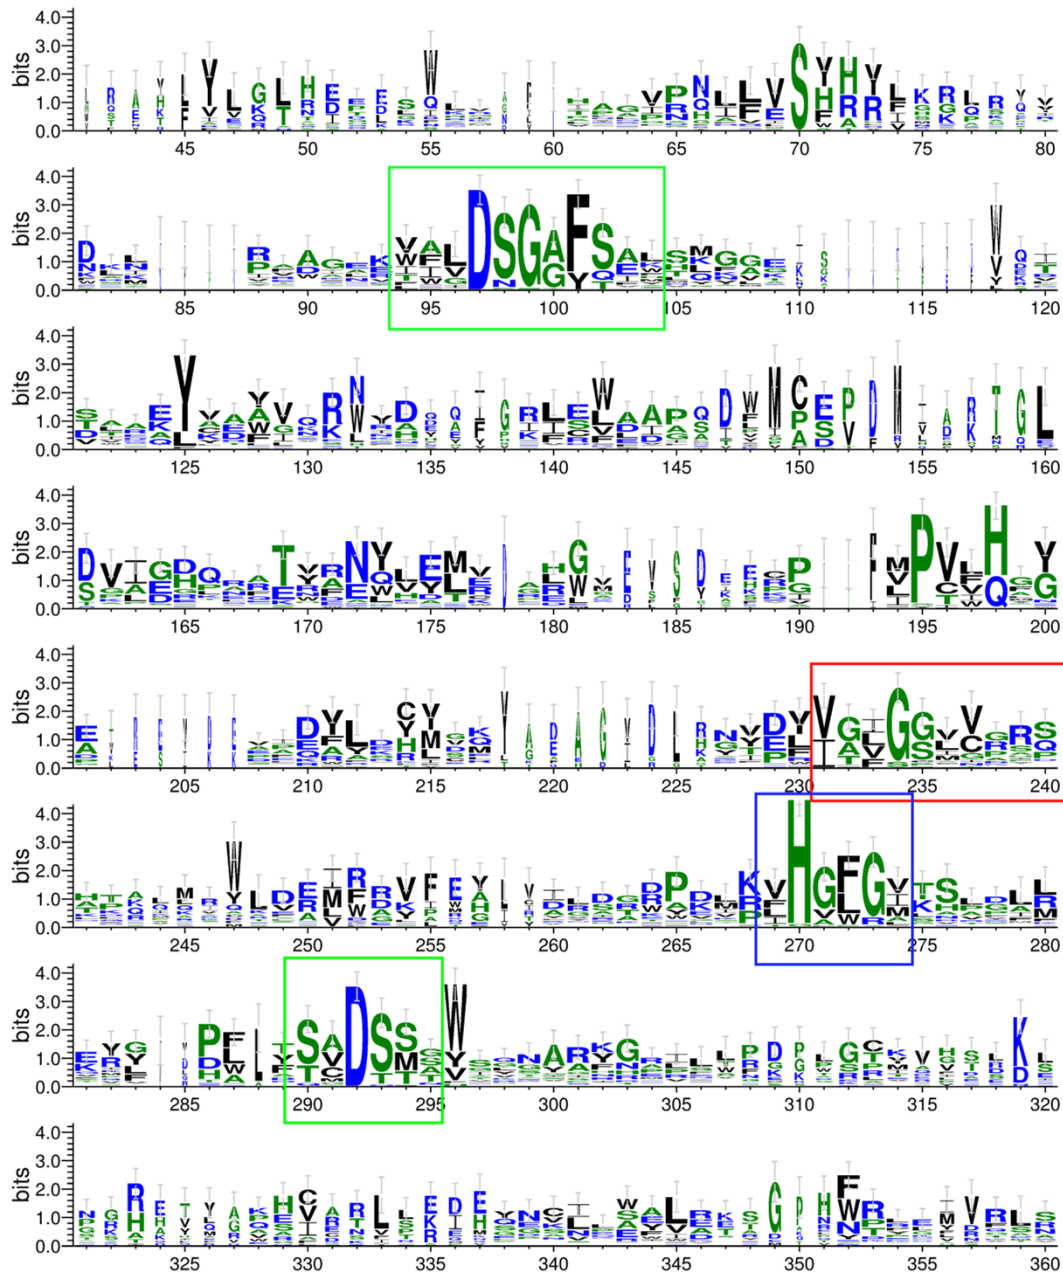

**Figure S13.** Sequence logo representing the alignment of the phage Tgt-like proteins. The putative catalytic domains are shown in the green boxes, the predicted substrate binding site is shown in the red box, and the conserved histidine is shown in the blue box.
